# Supplementary material
Source: ML conference proceedings conference paper supplement (https://openreview.net/forum?id=XuQfB6RqSd)
Supplement: supplementary_material [file attachment]

# ONLINE LEARNING WITH RECENCY: ALGORITHMS FOR SLIDING-WINDOW STREAMING MULTI-ARMED BANDITS

Anonymous authors

Paper under double-blind review

## ABSTRACT

Motivated by the recency effect in online learning, we study algorithms for single-pass *sliding-window streaming multi-armed bandits (MABs)* in this paper. In this setting, we are given  $n$  arms with unknown sub-Gaussian reward distributions and a parameter  $W$ . The arms arrive in a single-pass stream, and only the most recent  $W$  arms are considered valid. The algorithm is required to perform pure exploration and regret minimization with *limited memory*, defined as the number of stored arms. The model is a natural extension of the streaming multi-armed bandits model (without the sliding window) that has been extensively studied in recent years. We provide a comprehensive analysis of both the pure exploration and regret minimization problems with the model. For pure exploration, we prove that finding the best arm is hard with sublinear memory while finding an *approximate* best arm admits an efficient algorithm. For regret minimization, we explore a new notion of regret and give sharp memory-regret trade-offs for any single-pass algorithms. We complement our theoretical results with experiments, demonstrating the trade-offs between sample, regret, and memory.

## 1 INTRODUCTION

The stochastic multi-armed bandits (MABs) model is a fundamental model extensively studied in machine learning (ML) and theoretical computer science (TCS). In its most common form, we are given  $n$  arm with unknown sub-Gaussian reward distributions, and we can learn the instance by *sampling* from the arms. The most important problems in the model include *pure exploration*, where the goal is to identify the best or a near-optimal arm, and *regret minimization*, where the aim is to devise a sampling strategy that performs competitively against the best arm in hindsight. The multi-armed bandits model has found broad applications in experiment design and clinical trials (Robbins, 1952; Pallmann et al., 2018; Simchi-Levi & Wang, 2023), financial strategies (Shen et al., 2015; Trovò et al., 2018), information retrieval (Radlinski et al., 2008; Losada et al., 2017), algorithm design (Bouneffouf et al., 2017; Gullo et al., 2023), to name a few.

Classical algorithms for MABs often assume the entire set of  $n$  is stored in the memory for repeated access. However, this assumption can be unrealistic in modern online learning and large-scale applications, where arms may arrive sequentially in a stream, and the available memory is insufficient to store all of them. To address this challenge, the work of Liau et al. (2018); Assadi & Wang (2020) introduced the *streaming* multi-armed bandits model. In this model, the arms arrive one after another in a stream, and the algorithm would ideally maintain a memory substantially smaller than the total number of arms. The maximum number of arms maintained in the memory is defined as the *space complexity* of the algorithm. The streaming MABs model has attracted considerable attention since its introduction, and a flurry of work has established near-tight trade-offs for pure exploration (Assadi & Wang, 2020; Jin et al., 2021; Maiti et al., 2021; Assadi & Wang, 2022; 2024; Karpov & Wang, 2025) and regret minimization (Liau et al., 2018; Maiti et al., 2021; Agarwal et al., 2022; Wang, 2023; He et al., 2025) in various settings.

047 While most work on streaming MABs targets global objectives, such as identifying the best arm overall, many  
 048 applications exhibit a recency effect, where recent arms matter more. For example, movie recommendation  
 049 systems must adapt quickly to shifting trends. A related motivation comes from privacy constraints: regula-  
 050 tions and policies often mandate data deletion after limited periods. GDPR requires data retention only for  
 051 the “necessary” duration (GDPR, 2016), Apple retains user data for 6 months (Apple Inc., 2021), and Google  
 052 limits anonymized advertising data to 9 months (Google LLC, 2025). Alas, streaming MABs algorithms  
 053 usually do not take any recency effect into consideration. For instance, the pure exploration algorithms, e.g.,  
 054 the ones in Assadi & Wang (2020); Jin et al. (2021); Maiti et al. (2021), may output an arm that arrives very  
 055 early in the stream, which is far from being recent. Similarly, the regret minimization algorithms in Maiti  
 056 et al. (2021); Wang (2023); He et al. (2025) may commit to an arm that is outside the pool of recent arms<sup>1</sup>.  
 057 As such, the following motivating open question could be asked: *could we design efficient streaming MABs  
 058 algorithms that incorporate the recency effect?*

059 **Sliding-window streaming multi-armed bandits.** One of the most common models that capture the recency  
 060 effect is the sliding-window streaming model (Datar et al., 2002; Datar & Motwani, 2016). In a typical  
 061 sliding-window stream, a total of  $n$  data items (arms in the context of MABs) are arriving in a stream, and  
 062 only the past  $W$  items are considered valid. The sliding-window streams have been extensively studied in  
 063 various contexts, including frequency estimation (Datar et al., 2002; Braverman & Ostrovsky, 2007), graph  
 064 algorithms (Crouch et al., 2013; Crouch & Stubbs, 2014; Zhang et al., 2024), clustering (Braverman et al.,  
 065 2016; Borassi et al., 2020; Epasto et al., 2022; Woodruff et al., 2023; Cohen-Addad et al., 2025), among  
 066 others (Tao & Papadias, 2006; Zhang et al., 2016).

067 Inspired by the success of sliding-window streams on various problems, we define the natural notion of  
 068 sliding-window streaming MABs to explore the recency effect. Here, we are given  $n$  arms arriving in a  
 069 (single-pass) stream, and we are additionally given a window size  $W$ . When the  $t$ -th arm arrives, the arms  
 070 with the arrival orders in  $[t - W + 1, t]$  are considered the *valid* set of arms at this point. **We emphasize that  
 071 throughout the paper,  $W$  and  $n$  are parameters given by the problem instance, and we cannot adjust these  
 072 parameters.** The algorithm is allowed to store *any* arm (not limited to the window) regardless of whether  
 073 the arm is valid<sup>2</sup>. The central problems here are therefore the *pure exploration* and *regret minimization* in  
 074 sliding-window streaming MABs.

## 075 1.1 OUR CONTRIBUTIONS

076 We give a comprehensive analysis of pure exploration and regret minimization algorithms for sliding-window  
 077 streaming MABs in this paper. Our results can be summarized in Table 1.

079 **Pure explorations.** For pure explorations, we studied both *pure exploration*, where the goal is to return the  
 080 *exact* best arm, and  $\varepsilon$  exploration, where the goal is to return an arm whose mean is  $\varepsilon$ -close to the best. In  
 081 both notions, the best arm is defined as the arm with the highest mean reward in the *sliding window*. Our  
 082 main conceptual message is that finding the *exact* best arm is hard unless using  $\Omega(W)$  arms of memory space,  
 083 but finding the *approximation* best arm is possible with sample and space efficiency.

084 **Result 1** (Informal of Theorems 1 and 2). *The following statements are true for exploration in sliding-  
 085 window MABs.*

- 086 • Any algorithm that finds the (*exact*) best arm at any step with probability at least 99/100 in  
 087 the sliding-window streaming multi-armed bandits requires  $\Omega(W)$  arm memory, even with an  
 088 unlimited number of arm pulls.

091 <sup>1</sup>This intuitively means the algorithm incurs large regret, although the definition of regret has more nuance in such  
 092 cases. See Section 1.1 and Section 2 for details.

093 <sup>2</sup>The arms outside the sliding window could still be useful in various subroutines, e.g., comparing the means.

- There exists an algorithm that finds a (*approximate*)  $\varepsilon$ -best arm with probability at least  $1 - \delta$  at any steps with  $O(\frac{1}{\varepsilon})$  arm memory and  $O(\frac{n}{\varepsilon^2} \log \frac{W}{\delta})$  arm pulls.

By a standard probability boosting argument, the success probability of 99/100 in the lower bound generalizes to any probability of  $1/2 + \Omega(1)$ . On the other hand, our results demonstrate that we can identify an approximate best arm with arbitrary constant accuracy using only  $O(\frac{1}{\varepsilon})$  memory. For constant choice of  $\varepsilon$  (which is usually the case), our algorithm achieves *constant memory* for exploration.

**Regret minimization.** For *regret minimization*, a significant challenge is how to *define* regret in the sliding-window model. The most natural definition is to define the regret as the cumulative gap between  $\mu^*(t, W)$  and the means of the pulled arms in each window. Here,  $\mu^*(t, W)$  is the mean reward of the optimal arm in the window  $W$  at time  $t$ . However, such a definition has a fatal issue: since the algorithm controls the number of arm pulls before the window moves, the definition of the regret becomes a function of the algorithm, which means it cannot be well-defined.

To bypass the issue, we introduce the notion of *epoch-wise* regret such that the optimal reward sequences are *independent* of the arm pulls used by the algorithm. Our notion of regret minimization is to divide the total number of arms pulls  $T$  into *equal-sized epochs*. Among the  $n - W + 1$  epochs (one for each window position), each epoch is allocated with  $\frac{T}{n-W+1}$  arm pulls. Total regret is defined as cumulative regret across epochs, and the algorithm is required to pull arms a constrained number of times in each time window. A formal definition of our regret notion can be found in Definition 6.

We believe that the introduction of the regret notion is a significant contribution; otherwise, there is no obvious way to study regret minimization in sliding-window streaming MABs. Moreover, the epoch-wise regret definition captures many practical scenarios. For instance, in the case of movie recommendations, we treat the “sliding window” as time periods of, e.g., 1-2 months, and we aim to recommend the most relevant movies in each period. Our main conceptual finding for regret minimization is that a memory of  $\Omega(W)$  arms is necessary to achieve  $o(T)$  regret; furthermore, there is a sharp memory-regret transition around the  $\Theta(W)$  arm memory.

**Result 2** (Informal of Theorem 3). *Any algorithm that achieves  $o(T/W^2)$  regret in the epoch-wise regret setting requires  $\Omega(W)$  arm memory. Furthermore, there exist algorithms that given a stream of  $n$  arms and parameters  $T$  and  $W$ , with  $O(W)$  memory achieve  $O(\sqrt{W \cdot (n - W) \cdot T})$  regret.*

In the centralized setting, the tight bound for regret minimization is  $O(\sqrt{nT})$ , even with unlimited memory. Since  $O(\sqrt{W(n - W)T}) = O(\sqrt{nT})$  when  $|n - W|$  or  $W$  is small, this shows that our bound for *epoch-wise regret* setting is indeed tight in the worst case. We find the conceptual message quite interesting, and we believe it could serve as important guidelines for related applications. A variant of our regret setting is when the best arm does not expire with the movement of the sliding window. While the setting is less interesting, we do believe it has applications as well. A discussion of this setting can be found in Section E.

**Our techniques.** We start with  $\varepsilon$ -exploration in sliding-window streaming MABs, in which there are two main technical challenges: the memory constraints and the expiration of arms. An efficient sliding-window algorithm would imply an efficient streaming algorithm (by setting  $W = n$ ); as such, for any MABs technique to work in the sliding-window setting, there must be a streaming algorithm as well. For the majority of MABs techniques, efficient streaming algorithms either do not exist (e.g., elimination-based algorithms Even-Dar et al. (2006); Karnin et al. (2013)), or it is unclear how to design such algorithms (e.g., non-stationary bandits Whittle (1988) and mortal bandits Chakrabarti et al. (2008)). Therefore, we have to find technical ideas from existing streaming MABs algorithms (e.g. Assadi & Wang (2020); Jin et al. (2021); Maiti et al. (2021)).

Most of the algorithms in streaming MABs are either based on amortizing the sample complexity across the stream or using a bucket-based idea group arms based on the empirical means. The idea of amortization faces

| Task                              | Space              | Sample/Regret                            | Remark                 |
|-----------------------------------|--------------------|------------------------------------------|------------------------|
| Exact Exploration                 | $\Omega(W)$        | Any                                      | Lower Bound            |
| Strong $\varepsilon$ -exploration | $O(1/\varepsilon)$ | $\Theta(\frac{n}{\varepsilon^2} \log n)$ | Upper and Lower Bounds |
| Weak $\varepsilon$ -exploration   | $O(1/\varepsilon)$ | $\Theta(\frac{n}{\varepsilon^2} \log W)$ | Upper Bound            |
| Regret minimization               | $o(W)$             | $\Omega(T/W^2)$                          | Lower Bound            |
|                                   | $\Omega(W)$        | $O(\sqrt{W} \cdot (n - W) \cdot T)$      | Upper Bound            |

Table 1: Summary of the results for exploration and regret minimization

a barrier aimed at the expiration of arms. In particular, for the algorithms that amortize sample complexity in, e.g., Assadi & Wang (2020); Jin et al. (2021), the guarantees are only given with respect to the best arm, and the analysis falls apart if the best arm changes due to the sliding window movements. On the other hand, the grouping of empirical means based on the multiplicative of  $\varepsilon$  is naturally compatible with the sliding-window model. Here, we can simply discard the expired arms, and the invariant among the buckets helps maintain  $\varepsilon$ -best arms. This is the main idea for our  $\varepsilon$ -exploration algorithms.

Our lower bound for the exact pure exploration establishes a sharp dichotomy between the exact and approximate  $\varepsilon$ -exploration problems. Here, the main challenge is to find a distribution that forces the algorithm to store virtually all arms. Our idea is to use a distribution of arms with *decreasing mean rewards*. This distribution forces the “useless” arm when the window is at position  $t$  to become optimal when the window moves to  $t + 1$ . Although the distribution is not involved, it crucially uses the sliding-window property to separate from the streaming case, especially given that the latter admits an efficient algorithm with a single-arm memory (Assadi & Wang (2020)). Finally, our regret lower bound follows the same idea, although we need to extend the distribution to slightly more involved ones to ensure the algorithm cannot get “lucky” with the instance distribution.

**Experiments.** We conducted experiments for both pure exploration and regret minimization applications<sup>3</sup>. For pure exploration, we implemented the  $\varepsilon$ -best pure exploration algorithm, and for regret minimization, we used the  $O(W)$ -memory algorithms outlined in Result 2. These are the first algorithms designed to work with multi-armed bandits (MABs) under a sliding-window setting.

In our pure exploration experiments, we tested configurations with  $n \in \{1000, 2000, 5000\}$  and  $n \in \{10, 20, 50\}$ . The results indicate a relatively smooth trade-off between the quality of the returned arm and the memory used. The error exceeded 0.6 in all settings when we employed a memory size of  $0.05W$ ; however, it dropped to below 0.3 with a memory size of  $0.3W$ . On the other hand, we can easily show that existing algorithms could result in 0.6 error (Section F), and our empirical results essentially mean that with  $0.3W$  memory, the error could be reduced by 50%. For the regret minimization experiments, we tested configurations with  $n \in \{500, 1000, 2000\}$  and  $n \in \{10, 20, 50\}$ , while setting the number of pulls for each epoch to  $\frac{T}{n-W+1} = 1000$ . The results revealed sharp changes in regret around the memory size  $W$ , confirming our theoretical predictions. The total regret decreased by more than 50% for most configurations when the memory size increased from  $0.05W$  to  $W$ .

<sup>3</sup>Our code is available on anonymous Github: <https://anonymous.4open.science/r/sliding-window-MABs-CF74/>.

## 2 PROBLEM DEFINITION AND PRELIMINARIES

In this section, we give the formal definition of the problems we investigated and some standard technical tools. We start with a formal definition of stochastic MABs.

**Definition 1** (Stochastic multi-armed bandits (MABs) model). In the stochastic multi-armed bandits model, we have a collection of  $n$  arms  $\{\text{arm}_i\}_{i=1}^n$ , and each arm follows a distribution with mean  $\mu_i \in [0, 1]$ . Each pull of  $\text{arm}_i$  returns a sample from the distribution with mean  $\mu_i$ .

Note that by the central limit theorem, sampling from arbitrary distributions over  $[0, 1]$  is essentially the same as sampling from an arbitrary sub-Gaussian distribution (up to a scaling factor). The sliding-window streaming MABs could therefore be defined as follows.

**Definition 2** (The sliding-window streaming MABs model.). In the sliding-window streaming MABs model, we have a collection of  $n$  arms  $\{\text{arm}_i\}_{i=1}^n$  arranged in order and a window size  $W^4$ . Each arm follows a distribution with mean  $\mu_i \in [0, 1]$ . The arms arrive one by one in the stream, and we let  $\{\text{arm}_i\}_{i=t-W+1}^t$  be the set of valid arms that arrived in the  $W$  latest steps. When a new arm arrives, the algorithm can pull the arriving arm and the arms in memory. The algorithm can also decide whether to store the new arm in memory or discard it, and the algorithm can discard some arms stored in memory to free up space. At any point, the collection of arms that the algorithm could access are the arms in memory and the arriving arm.

**Remark 1.** To keep consistent with the literature in sliding-window streaming algorithms, e.g., Datar et al. (2002); Datar & Motwani (2016), we do *not* force the algorithm to discard the expired arms. Nevertheless, our upper and lower bounds in Result 1 and Result 2 do *not* rely on this property. In other words, if we add the condition that the expired arms have to be deleted immediately, the upper and lower bounds in Result 1 and Result 2 still hold. The immediate removal of expired arms from the memory is helpful for applications with private data retention requirements.

We can now define the *sample and space complexity* of a sliding-window streaming MABs algorithm.

**Definition 3** (*Sample complexity*). The *sample complexity* of a sliding-window streaming MABs algorithm is defined as the total number of pulls of the algorithm.

**Definition 4** (*Space complexity*). The *space complexity* of a sliding-window streaming algorithm is defined as the maximum number of arms that we store in the memory at any time during the algorithm.

**Pure exploration.** One of the most natural problems in the MABs problem in the sliding-window model is the *pure exploration* problem, where the algorithm is asked to return the best or near-best arms. In what follows, we discuss the necessary notions before formally defining the pure exploration problems.

**Definition 5** (*Best arm in the window*). Assume that we have a collection of  $n$  arms  $\{\text{arm}_i\}_{i=1}^n$  with means  $\mu_i$  and arranged in the streaming arriving ordered. Let  $W$  be the window size and  $t$  be the index of the current arriving arm. Then, for any  $t \in [n]$ , the best arm in the window  $\text{arm}^*(W, t)$  is the arm with the highest mean  $\mu^*(W, t)$  among the  $W$  latest arms  $\{\text{arm}_i\}_{i=t-W+1}^t$ .

Note that the notation  $\text{arm}^*(W, t)$  is a function of  $t$  and  $W$ . We also call the set of arms  $\{\text{arm}_i\}_{i=t-W+1}^t$  *valid* at time step  $t$  for fixed  $t$  and  $W$ .

We are ready to introduce the *pure exploration* problem for the sliding-window streaming MABs model.

**Problem 1** (Exact pure exploration in sliding-window MABs). Given a stream of  $n$  arms  $\{\text{arm}_i\}_{i=1}^n$  and a window size  $W$ , we say a sliding-window streaming MABs algorithm ALG solves

- *weak* pure exploration with probability  $1 - \delta$  if at any time  $t \in [n]$ , ALG can output the best arm in the window with probability at least  $1 - \delta$ .

<sup>4</sup>We emphasize that the parameter  $W$  is an input parameter (not the algorithm’s choice).

- *strong* pure exploration with probability  $1 - \delta$  if ALG can output the best arm in the window at all time  $t \in [n]$  with probability  $1 - \delta$ .

Next, we could analogously define the  $\varepsilon$  exploration problem in both the *weak* and the *strong* versions for the sliding-window streaming MABs.

**Problem 2** ( $\varepsilon$  exploration in sliding-window MABs). Given a stream of  $n$  arms  $\{\text{arm}_i\}_{i=1}^n$ , a window size  $W$ , and a parameter  $\varepsilon$ , we say a sliding-window streaming MABs algorithm ALG solves

- *weak*  $\varepsilon$  exploration with probability  $1 - \delta$  if at any time  $t \in [n]$ , ALG is able to output an arm with mean reward  $\mu$  such that  $\mu \geq \mu^*(t, W) - \varepsilon$  with probability at least  $1 - \delta$ .
- *strong*  $\varepsilon$  exploration with probability  $1 - \delta$  if ALG is able to output an arm with mean reward  $\mu$  such that  $\mu \geq \mu^*(t, W) - \varepsilon$  at all time  $t \in [n]$  with probability  $1 - \delta$ .

Here, as defined in Definition 5,  $\mu^*(t, W)$  is the mean reward of the best arm in the window.

**Regret minimization.** In Section 1.1, we have discussed the high-level definition for our regret notion in sliding windows, i.e., the epoch-wise regret. We now introduce the formal definition as follow.

**Definition 6** (Regret minimization with epoch-wise regrets). Let  $\{\text{arm}_i\}_{i=1}^n$  be a collection of  $n$  arms, and let  $W$  and  $T$  be the window size and the total number of trials. We divide  $T$  into  $(n - W + 1)$  equal-sized *epochs* with  $\frac{T}{n-W+1}$  in each epoch. Let  $t$  be the variable for the index of the arriving arm, and for any  $t$ , the algorithm is required to conduct *exactly*  $\frac{T}{n-W+1}$  arm pulls among  $\{\text{arm}_i\}_{i=t-W+1}^t$ . We define the regret of the  $j$ -th epoch as  $R^E(j) = \sum_{\tau=1}^{T/(n-W+1)} (\text{arm}^*(W, t) - \text{arm}_{i(\tau)})$ , where  $i(\tau)$  is the arm index pulled by the algorithm. The total regret is defined as  $R_T = \sum_{j=1}^{T/(n-W+1)} R^E(j)$ , i.e., the regret over the epochs.

### 3 A LOWER BOUND FOR PURE EXPLORATION IN SLIDING-WINDOW MABs

The most natural pure exploration problem is *pure exploration* which asks to return the *best arm*. In the vanilla streaming multi-armed bandits (MABs) model, pure exploration can be solved with  $O(n/\Delta_{[2]}^2)$  samples and a single-arm memory, where  $\Delta_{[2]}$  represents the difference between the mean of the best and the second-best arms. As such, one would naturally wonder whether the same story applies to the sliding-window model. In this section, we will show that pure exploration is surprisingly much harder in the sliding-window streams: unless the algorithm uses  $\Omega(W)$  space, we cannot obtain any algorithm that solves pure exploration.

The hard instance for our lower bound is a stream with descending mean rewards of arms, i.e.,  $\mu_1 > \mu_2 > \dots > \mu_n$  for arms. The optimal solution for the sliding-window MABs would be to select  $\text{arm}_{n-W+1}$ , which is the oldest non-expired arm. However, to always keep the oldest arm that has not expired in the memory, we would naturally need  $W$  memory. The following theorem formalizes the above intuitions.

**Theorem 1.** *Any algorithm that given  $n$  arms in a sliding-window stream with a window size of  $W$ , solves the weak or strong pure exploration problem in sliding-window streaming multi-armed bandits with a probability of at least  $99/100$  has a space complexity of at least  $\Omega(W)$ , even if the sample complexity is unbounded.*

*Proof.* We prove the theorem for weak pure exploration, since the task of strong pure exploration is only harder. In other words, since the answer for strong exploration is always valid for weak exploration, the former task should use at least the same amount of memory and samples.

By Yao’s minimax principle (Yao, 1977), it is sufficient to prove the lower bound for deterministic algorithms over a challenging distribution of inputs. Let  $n = 2W$ . We construct the instance  $\{\text{arm}_i\}_{i=1}^n$  such that  $\mu_i = 1 - \frac{i}{3W}$ . To solve the *weak* pure exploration problem with a probability of at least  $\frac{99}{100}$ , the algorithm must correctly identify at least  $\frac{49}{50}$  of the best arms in the second half of the stream  $\{\text{arm}_i\}_{i=1}^n$ . If the algorithm fails to do this, the overall success probability would drop below  $1 \cdot \frac{1}{2} + \frac{49}{50} \cdot \frac{1}{2} = \frac{99}{100}$ .

Let  $T \subset \{W + 1, W + 2, \dots, 2W\}$  represent the collection of times when the algorithm correctly identifies the best arm in the window during the second half of the stream. Define  $A = \{\text{arm}^*(W, t) | t \in T\}$  as the set of best arms in the window at times  $t \in T$ . For any  $t \in \{W + 1, W + 2, \dots, 2W\}$ , the best arm in the window  $\text{arm}^*(W, t)$  should be  $\text{arm}_{t-W+1}$  because the expected values of the arms monotonically decrease in this instance. Therefore, we have  $A = \{\text{arm}_{t-W+1} | t \in T\}$ . Given that  $T \subset \{W + 1, W + 2, \dots, 2W\}$  and  $|T| \geq \frac{49}{50}W$ , it follows that  $A \subset \{\text{arm}_2, \text{arm}_3, \dots, \text{arm}_{W+1}\}$  and  $|A| = |T| \geq \frac{49}{50}W$ .

For any  $W + 1 \leq t < 2W$ ,  $\text{arm}^*(W, t) = \text{arm}_{t-W+1}$  has already arrived by time  $W + 1$ . Therefore, for any  $t \in T \cap [2W - 1]$ ,  $\text{arm}^*(W, t)$  must be stored in memory by time  $W + 1$  so that it can be returned at time  $t$ . This means that at least  $|A| - 1 = \frac{49}{50}W - 1$  arms must be stored in memory at time  $W + 1$ . Hence, according to Yao’s minimax principle, the algorithm must have a *space complexity* of at least  $\Omega(W)$ .  $\square$

Note that the success probability of 99/100 in the theorem is not inherently special: by a simple probability boosting argument, we can always maintain  $O(1)$  copies of the algorithm and output the majority with asymptotically the same memory and number of samples. As such, our lower bound in Theorem 1 applies to any success probability of  $1/2 + \Omega(1)$ .

## 4 SLIDING-WINDOW ALGORITHMS AND LOWER BOUNDS FOR $\varepsilon$ -PURE EXPLORATION

Section 3 depicts a very pessimistic picture for the pure exploration of the *best arm* in sliding-window streaming MABs. A natural question to follow is whether we could get positive results using a relaxed notion. A natural candidate for this purpose is the  $\varepsilon$  exploration under the  $(\varepsilon, \delta)$ -PAC framework. Here, instead of returning the *single best* arm, we are allowed to obtain an arm whose gap is within  $\varepsilon$  additive to the best, i.e., return an arm with mean reward  $\mu \geq \mu^* - \varepsilon$ . In this section, we present the bounds for both *strong* and *weak*  $\varepsilon$  exploration. Our main results are:

- A pure exploration algorithm that solves *weak*  $\varepsilon$  exploration with probability  $1 - \delta$  in the sliding-window streaming MABs model with  $O\left(\frac{n}{\varepsilon^2} \log \frac{W}{\delta}\right)$  *sample complexity* and  $O\left(\frac{1}{\varepsilon}\right)$  *space complexity*.
- A lower bound shows that for any algorithm to solve *strong*  $\varepsilon$  exploration with probability 99/100 in the sliding-window streaming MABs model, the algorithm has to use  $\Omega\left(\frac{n}{\varepsilon^2} \log \frac{n}{W}\right)$  sample complexity. Since  $n \gg W$  in most cases, the lower bound separated the *weak* and *strong*  $\varepsilon$  exploration problems in the sliding-window streaming MABs model.
- Finally, we give a nearly-matching algorithm for *strong*  $\varepsilon$  exploration with probability  $1 - \delta$  in the sliding-window streaming MABs model with  $O\left(\frac{n}{\varepsilon^2} \log \frac{n}{\delta}\right)$  *sample complexity* and  $O\left(\frac{1}{\varepsilon}\right)$  *space complexity*.

### 4.1 AN EFFICIENT ALGORITHM FOR WEAK $\varepsilon$ -PURE EXPLORATION

We start with introducing a streaming algorithm designed for *weak*  $\varepsilon$  exploration.

**Theorem 2.** *There exists a streaming algorithm that, given  $n$  arms arriving in a sliding-window stream with a window size  $W$  and a confidence parameter  $\delta$ , solves weak  $\varepsilon$  exploration with a probability of at least  $1 - \delta$  using a sample complexity of  $O\left(\frac{n}{\varepsilon^2} \log \frac{W}{\delta}\right)$  and a space complexity of  $O\left(\frac{1}{\varepsilon}\right)$ .*

At a high level, the algorithm follows the idea of partitioning the range  $[0, 1]$  into  $O\left(\frac{1}{\varepsilon}\right)$  segments (“buckets”) of equal length. An arm is considered to belong to a bucket if its mean value falls within the range of that segment. For an arm  $\text{arm}_i$  that belongs to bucket  $B$ , any arm  $\text{arm}'$  that is in a nearby bucket would serve as an  $\varepsilon$ -approximation of  $\text{arm}_i$ . If we pull each arm an adequate number of times, we can ensure that any arm is placed into a bucket that is close enough to its mean; thus, the non-expired arm from the highest bucket will be an  $\varepsilon$ -best arm. To optimize memory usage, we store only the latest arm for each bucket instead of all the arms that belong to that bucket. Our algorithm for *weak*  $\varepsilon$  exploration is presented in Algorithm 1, with the pulling size set to  $s = (9/2\varepsilon^2) \cdot \ln 6W/\delta$ .

---

**Algorithm 1:** Efficient Algorithm for  $\varepsilon$  exploration in Sliding-window Streaming MABs: BUCKET( $s$ )

---

**Input:** Data stream  $\{\text{arm}_i\}_{i=1}^n$ , window size  $W$ , confidence parameter  $\delta$  and accuracy parameter  $\varepsilon$ ;**Input:** Sample complexity:  $s = \frac{9}{2\varepsilon^2} \ln \frac{6W}{\delta}$  for weak exploration and  $s = \frac{9}{2\varepsilon^2} \ln \frac{6n}{\delta}$  for strong exploration;**Output:**  $\varepsilon$ -best arms  $\{\widehat{\text{arm}}_i\}_{i=1}^n$ ; $N \leftarrow \frac{3}{\varepsilon}$ ;Generate  $N$  buckets  $B_1, B_2, \dots, B_N$ ;**for each arriving arm  $\text{arm}_i$  do**    Pull  $\text{arm}_i$  for  $s$  times and evaluate empirical mean  $\widehat{\mu}_i$ ;    Store  $\text{arm}_i$  in  $B_j$  such that  $(j-1)\frac{\varepsilon}{3} < \widehat{\mu}_i \leq j\frac{\varepsilon}{3}$  and discard the arms stored in  $B_j$  previously;

Discard all stored arms that are expired;

 $\widehat{\text{arm}}_i \leftarrow$  the arm stored in  $B_k$  such that  $k = \max_{i \leq N} \{B_i \neq \emptyset\}$ **end****return**  $\{\widehat{\text{arm}}_i\}_{i=1}^n$ 

---

4.2 A LOWER BOUND FOR STRONG  $\varepsilon$ -PURE EXPLORATION

We will now discuss the lower bound for *strong*  $\varepsilon$  exploration that has an extra  $\log n$  factor. In particular, if we show that when  $W \ll n$  (e.g.,  $W = \log n$ ), there is a lower bound of  $\Omega(\frac{n}{\varepsilon^2} \log n)$  samples for strong exploration, it would imply a *separation* between the *weak* and *strong*  $\varepsilon$  exploration since the weak exploration only requires  $\Omega(\frac{n}{\varepsilon^2} \log W)$  samples by Algorithm 1 BUCKET( $\frac{9}{2\varepsilon^2} \ln \frac{6W}{\delta}$ ). Then we have:

**Lemma 4.1.** *For infinitely many choices of parameters  $n$ ,  $\varepsilon$ , and  $W \leq n^{0.99}$ , there exists a distribution of arms  $\mathcal{D}(n, W, \varepsilon)$  such that any algorithm that solves the strong  $\varepsilon$  exploration with probability at least 99/100 on  $\mathcal{D}(n, W, \varepsilon)$  requires at least  $\Omega(\frac{n}{\varepsilon^2} \log n)$  samples. The lower bound holds even if the algorithm is with unbounded memory.*

The technical statement for Lemma 4.1 is more general and gives  $\Omega(\frac{n}{\varepsilon^2} \log \frac{n}{W})$  samples for  $W \in [1, n/8]$ , although the bound is less informative when  $W$  is large. At a high level, our lower bound works by reducing solving *independent* copies of the  $\varepsilon$ -best arm identification to the sliding-window streaming  $\varepsilon$  exploration case. Mannor & Tsitsiklis (2004) proved that  $O(\frac{n}{\varepsilon^2} \log(\frac{1}{\delta}))$  pulls are necessary to identify an  $\varepsilon$ -best arm among  $n$  arms with a probability of at least  $1 - \delta$ .

In the slide-window setting, since arms will expire after  $W$  time, the information from one window does not affect another *disjoint* window. There are  $\Theta(\frac{n}{W})$  windows in a sliding-window stream that are disjoint. Since each window requires at least  $O(\frac{W}{\varepsilon^2} \log(\frac{n}{W}))$  pulls to solve its exploitation with a probability of at least  $1 - \Theta(\frac{W}{n})$ , it follows that  $O(\frac{n}{\varepsilon^2} \log(\frac{n}{W}))$  pulls are necessary to achieve *strong*  $\varepsilon$  exploration with a probability of at least 99/100.

4.3 AN EFFICIENT ALGORITHM FOR STRONG  $\varepsilon$ -PURE EXPLORATION

We introduce a streaming algorithm for *strong*  $\varepsilon$  exploration. The algorithm uses essentially the same subroutine as in Algorithm 1, but it uses a larger pulling size of  $s = \frac{9}{2\varepsilon^2} \ln \frac{6n}{\delta}$  to beat a union bound.

**Lemma 4.2.** *There exists a streaming algorithm that, given  $n$  arms arriving in a sliding-window stream with a window size  $W$  and a confidence parameter  $\delta$ , solves strong  $\varepsilon$  exploration with a probability of at least  $1 - \delta$ . This algorithm achieves a sample complexity of  $O(\frac{n}{\varepsilon^2} \log \frac{n}{\delta})$  and a space complexity of  $O(\frac{1}{\varepsilon})$ .*

## 5 REGRET MINIMIZATION IN SLIDING-WINDOW STREAMING MABS

In this section, we investigate *regret minimization* for sliding-window streaming multi-armed bandits (MABs). Recall that in Definition 6, we defined regret minimization with the concepts of *epoch-wise* regret. Here, we have  $n - W + 1$  equal-sized epochs, and we must perform  $\frac{T}{n-W+1}$  pulls in each epoch. The question is how to minimize the cumulative regret over the entire horizon  $[T]$ .

The most natural idea is to adapt strategies in streaming MABs, e.g., (Wang, 2023), to get a low regret algorithm. In particular, when a new arm arrives, we can use Algorithm 1 to pull the arm  $O(\frac{1}{\varepsilon^2} \log n)$  times and place it in the bucket. By the guarantees of Algorithm 1, we will be able to get  $\varepsilon$ -best arms at any step with high probability. This strategy incurs a regret of  $O(\frac{1}{\varepsilon^2} \log n)$  when identifying the  $\varepsilon$ -best arm during each epoch. Additionally, there is a regret of  $O(\varepsilon \frac{T}{n-W+1})$  for the remaining pulls on the  $\varepsilon$ -best arm we identify within each epoch. As a result, the total regret is  $O(\frac{n}{\varepsilon^2} \log n + \varepsilon T)$ . The regret is minimized by choosing  $\varepsilon = O(\sqrt[3]{\frac{n \log n}{T}})$ , which gives a total regret of  $O(T^{\frac{2}{3}}(n \log n)^{\frac{1}{3}})$ .

Alas, this strategy has a fatal issue: Algorithm 1 requires  $O(\frac{1}{\varepsilon})$  memory space; and since in most cases  $T \gg n \gg W$ , the memory of  $1/\varepsilon = O(\sqrt[3]{\frac{T}{n \log n}})$  could be way bigger than the window size  $W$ . Thus, it is not immediately clear whether we could get low-regret algorithms with small memory in this setting. In this section, we show that the issue of the aforementioned algorithm is not an artifact: we prove a strong lower bound showing that a total regret of  $O(\frac{T}{W^2})$  is unavoidable if we only have  $o(W)$  space.

**Theorem 3.** *There exists a family of streaming stochastic multi-armed bandit instances such that, for any given parameters  $T$ ,  $n$ , and  $W$ , where  $T \geq n \geq 16W$ , any single-pass streaming algorithm for a sliding-window stream of length  $n$  with a window size  $W$  and a memory capacity of  $\frac{W-1}{2}$  arms must incur a total expected regret given by  $\mathbb{E}[R_T] \geq \frac{T}{64W^2}$ .*

*Furthermore, there exists an algorithm that given  $n$  arms arriving in a stream and parameters  $W$  and  $T$ , achieves  $O(\sqrt{W} \cdot (n - W) \cdot T)$  total regret with  $W$  memory.*

At a high level, our lower bound is obtained by constructing  $W$  arms whose means decrease by  $\frac{1}{W}$  and  $W$  arms with the same mean, and the pattern is repeated over the stream. Since we can only store at most half of these arms, if the best arm in the epoch is missed, the regret for each pull will be at least  $\frac{1}{2W}$ . This leads to a total regret of  $\Omega(\frac{T}{W^2})$ . Our upper bound is obtained by running UCB-based algorithms on each window.

## 6 EXPERIMENTS

We conduct experiments for both  $\varepsilon$ -exploration and regret minimization in the sliding-window streaming setting. Our main empirical finding is that, consistent with our theoretical results, both the  $\varepsilon$ -exploration and regret minimization algorithms demonstrate trade-offs between memory and quality/regret. The regret minimization algorithm demonstrates a sharp change around the  $O(W)$ -arm memory. We will briefly demonstrate the experiments of the  $\varepsilon$ -exploration and regret minimization algorithms in epoch-wise settings. Additional experimental results can be found in Section G.

**The data.** We use synthetic data with streams of arms to conduct our experiments. We use different types of instances for exploration and regret minimization as follows.

- For exploration, we sample  $n$  arms with the distribution  $\text{Bern}(p)$  such that  $p$  is from a uniform distribution<sup>5</sup>. We note that the “uniform” type of instances are more suitable for  $\varepsilon$ -exploration since the quality decrement

<sup>5</sup>We use  $\text{Bern}(p)$  to denote Bernoulli distribution with mean  $p$ .

of the returned arms could be better captured. We use  $n \in \{1000, 2000, 5000\}$  and  $W \in \{10, 20, 50\}$  for  $\varepsilon$ -exploration experiments.

- For regret minimization, we need instance distributions *consistent* with our instance distribution in Section 5. For the epoch-wise regret minimization, we sample  $n - n/W$  arms with distribution  $\text{Bern}(0.25)$  and  $n/W$  arms with distribution  $\text{Bern}(0.95)$ . We then permute the arms uniformly. Due to constraints on running time, we use  $n \in \{500, 1000, 2000\}$  and  $W \in \{10, 20, 50\}$  for  $\varepsilon$ -exploration experiments.

To mitigate the noise from randomness, for each parameter setting with fixed memory size, we conduct 10 **independent runs of experiments and take the average**. For the quality of the arm and the regret minimization, we also report error bars and the ranges of the regrets.

**The algorithms.** We conduct experiments for both exploration and regret minimization. We first implement and test our  $\varepsilon$ -exploration algorithm (Algorithm 1). **Note that it is hard to compare performances with baseline algorithms for sliding-window exploration since we cannot easily quantify “error” when the algorithm outputs an expired arm. Therefore, we report the performance of our algorithm with different memory sizes.**

For regret minimization, we adapt the algorithm with  $W$ -arm memory discussed in Section 5. To handle the case of  $m < W$ -arm memory, we simulate the reservoir sampling: after the memory is full, for each arriving arm, we toss a fair coin with bias  $m/t$  for the  $t$ -th arriving arm to decide whether we admit the new arm to the memory (by uniformly at random discarding an arm existing in the memory).

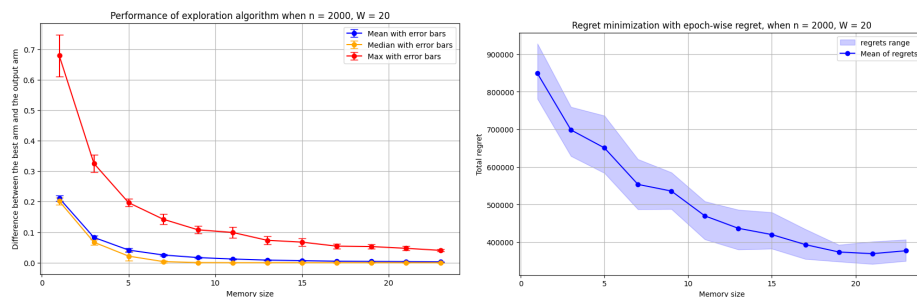

Figure 1: The performances of  $\varepsilon$ -exploration and regret minimization,  $n = 2000$ ,  $W = 20$ .

**Summary of the experiments.** A sample of the performances for  $\varepsilon$ -exploration and regret minimization is given in Figure 1 (for  $n = 2000$  and  $W = 20$ ; see Section G for more parameter settings). As we can observe from the figures, for all the experiments, there is generally a trade-off between the arm quality/regret and memory. The trade-off in  $\varepsilon$ -exploration is generally smoother, and the regret minimization for the everlasting best arm demonstrates a sharp drop of regret around the  $W$ -memory point. These results are consistent with our theoretical findings for sliding-window streaming MABs algorithms.

## 7 CONCLUSION AND FUTURE WORK

In this work, we initiated the study of multi-armed bandits (MABs) in the sliding-window model. Our results built the fundamental hardness of online learning in the sliding-window MABs model, and we provided important insights for related applications, e.g., using  $\varepsilon$ -exploration rather than pure exploration in practice. There are several open directions to follow up on our work. For instance, one appealing question is the *multi-pass* setting: if the algorithm is allowed to make multiple passes over the stream, it might be possible for the algorithm to achieve better memory efficiency. The sliding-window model for other variants of MABs, e.g., the linear bandits, can be another interesting direction to pursue.

## REFERENCES

- Arpit Agarwal, Sanjeev Khanna, and Prathamesh Patil. A sharp memory-regret trade-off for multi-pass streaming bandits. In Po-Ling Loh and Maxim Raginsky (eds.), *Conference on Learning Theory, 2-5 July 2022, London, UK*, volume 178 of *Proceedings of Machine Learning Research*, pp. 1423–1462. PMLR, 2022. URL <https://proceedings.mlr.press/v178/agarwal22a.html>.
- Apple Inc. Differential privacy overview. Apple, 2021. URL [https://www.apple.com/privacy/docs/Differential\\_Privacy\\_Overview.pdf](https://www.apple.com/privacy/docs/Differential_Privacy_Overview.pdf).
- Sepehr Assadi and Chen Wang. Exploration with limited memory: streaming algorithms for coin tossing, noisy comparisons, and multi-armed bandits. In Konstantin Makarychev, Yury Makarychev, Madhur Tulsiani, Gautam Kamath, and Julia Chuzhoy (eds.), *Proceedings of the 52nd Annual ACM SIGACT Symposium on Theory of Computing, STOC 2020, Chicago, IL, USA, June 22-26, 2020*, pp. 1237–1250. ACM, 2020. doi: 10.1145/3357713.3384341. URL <https://doi.org/10.1145/3357713.3384341>.
- Sepehr Assadi and Chen Wang. Single-pass streaming lower bounds for multi-armed bandits exploration with instance-sensitive sample complexity. In *NeurIPS, 2022*.
- Sepehr Assadi and Chen Wang. The best arm evades: Near-optimal multi-pass streaming lower bounds for pure exploration in multi-armed bandits. In Shipra Agrawal and Aaron Roth (eds.), *The Thirty Seventh Annual Conference on Learning Theory, June 30 - July 3, 2023, Edmonton, Canada*, volume 247 of *Proceedings of Machine Learning Research*, pp. 311–358. PMLR, 2024. URL <https://proceedings.mlr.press/v247/assadi24a.html>.
- Jean-Yves Audibert and Sébastien Bubeck. Minimax policies for adversarial and stochastic bandits. In *COLT*, pp. 217–226, 2009.
- Michele Borassi, Alessandro Epasto, Silvio Lattanzi, Sergei Vassilvitskii, and Morteza Zadimoghaddam. Sliding window algorithms for k-clustering problems. In Hugo Larochelle, Marc’Aurelio Ranzato, Raia Hadsell, Maria-Florina Balcan, and Hsuan-Tien Lin (eds.), *Advances in Neural Information Processing Systems 33: Annual Conference on Neural Information Processing Systems 2020, NeurIPS 2020, December 6-12, 2020, virtual*, 2020. URL <https://proceedings.neurips.cc/paper/2020/hash/631e9c01c190fc1515b9fe3865abbb15-Abstract.html>.
- Djallel Bouneffouf, Irina Rish, Guillermo A. Cecchi, and Raphaël Féraud. Context attentive bandits: Contextual bandit with restricted context. In Carles Sierra (ed.), *Proceedings of the Twenty-Sixth International Joint Conference on Artificial Intelligence, IJCAI 2017, Melbourne, Australia, August 19-25, 2017*, pp. 1468–1475. ijcai.org, 2017. doi: 10.24963/IJCAI.2017/203. URL <https://doi.org/10.24963/ijcai.2017/203>.
- Vladimir Braverman and Rafail Ostrovsky. Smooth histograms for sliding windows. In *48th Annual IEEE Symposium on Foundations of Computer Science (FOCS 2007), October 20-23, 2007, Providence, RI, USA, Proceedings*, pp. 283–293. IEEE Computer Society, 2007. doi: 10.1109/FOCS.2007.55. URL <https://doi.org/10.1109/FOCS.2007.55>.
- Vladimir Braverman, Harry Lang, Keith D. Levin, and Morteza Monemizadeh. Clustering problems on sliding windows. In Robert Krauthgamer (ed.), *Proceedings of the Twenty-Seventh Annual ACM-SIAM Symposium on Discrete Algorithms, SODA 2016, Arlington, VA, USA, January 10-12, 2016*, pp. 1374–1390. SIAM, 2016. doi: 10.1137/1.9781611974331.CH95. URL <https://doi.org/10.1137/1.9781611974331.ch95>.
- Deepayan Chakrabarti, Ravi Kumar, Filip Radlinski, and Eli Upfal. Mortal multi-armed bandits. *Advances in neural information processing systems*, 21, 2008.

- 517 Houshuang Chen, Yuchen He, and Chihao Zhang. On the problem of best arm retention. In Bo Li,  
518 Minming Li, and Xiaoming Sun (eds.), *Frontiers of Algorithmics - 18th International Joint Conference,*  
519 *IJTCS-FAW 2024, Hong Kong SAR, China, July 29-31, 2024, Proceedings*, volume 14752 of *Lecture*  
520 *Notes in Computer Science*, pp. 1–20. Springer, 2024. doi: 10.1007/978-981-97-7752-5\\_1. URL  
521 [https://doi.org/10.1007/978-981-97-7752-5\\_1](https://doi.org/10.1007/978-981-97-7752-5_1).
- 522
- 523 Vincent Cohen-Addad, Shaofeng Jiang, Qiaoyuan Yang, Yubo Zhang, and Samson Zhou. Fair clustering  
524 in the sliding window model. In *Proceedings of the Thirteenth International Conference on Learning*  
525 *Representations (ICLR 2025, to appear)*, 2025.
- 526
- 527 Michael Crouch and Daniel S. Stubbs. Improved streaming algorithms for weighted matching, via  
528 unweighted matching. In *Approximation, Randomization, and Combinatorial Optimization. Algo-*  
529 *rithms and Techniques, APPROX/RANDOM 2014, September 4-6, 2014*, pp. 96–104, 2014. doi:  
530 10.4230/LIPIcs.APPROX-RANDOM.2014.96.
- 531
- 532 Michael S. Crouch, Andrew McGregor, and Daniel M. Stubbs. Dynamic graphs in the sliding-window  
533 model. In Hans L. Bodlaender and Giuseppe F. Italiano (eds.), *Algorithms - ESA 2013 - 21st Annual*  
534 *European Symposium, Sophia Antipolis, France, September 2-4, 2013. Proceedings*, volume 8125 of  
535 *Lecture Notes in Computer Science*, pp. 337–348. Springer, 2013. doi: 10.1007/978-3-642-40450-4\\_29.  
536 URL [https://doi.org/10.1007/978-3-642-40450-4\\_29](https://doi.org/10.1007/978-3-642-40450-4_29).
- 537
- 538 Mayur Datar and Rajeev Motwani. The sliding-window computation model and results. In Minos N.  
539 Garofalakis, Johannes Gehrke, and Rajeev Rastogi (eds.), *Data Stream Management - Processing High-*  
540 *Speed Data Streams*, Data-Centric Systems and Applications, pp. 149–165. Springer, 2016. doi: 10.1007/  
541 978-3-540-28608-0\\_7. URL [https://doi.org/10.1007/978-3-540-28608-0\\_7](https://doi.org/10.1007/978-3-540-28608-0_7).
- 542
- 543 Mayur Datar, Aristides Gionis, Piotr Indyk, and Rajeev Motwani. Maintaining stream statistics over  
544 sliding windows. *SIAM J. Comput.*, 31(6):1794–1813, 2002. doi: 10.1137/S0097539701398363. URL  
545 <https://doi.org/10.1137/S0097539701398363>.
- 546
- 547 Alessandro Epasto, Mohammad Mahdian, Vahab S. Mirrokni, and Peilin Zhong. Improved sliding window  
548 algorithms for clustering and coverage via bucketing-based sketches. In Joseph (Seffi) Naor and Niv  
549 Buchbinder (eds.), *Proceedings of the 2022 ACM-SIAM Symposium on Discrete Algorithms, SODA 2022,*  
550 *Virtual Conference / Alexandria, VA, USA, January 9 - 12, 2022*, pp. 3005–3042. SIAM, 2022. doi:  
551 10.1137/1.9781611977073.117. URL <https://doi.org/10.1137/1.9781611977073.117>.
- 552
- 553 Eyal Even-Dar, Shie Mannor, and Yishay Mansour. Action elimination and stopping conditions for the  
554 multi-armed bandit and reinforcement learning problems. *Journal of Machine Learning Research*, 7:  
555 1079–1105, 2006.
- 556
- 557 GDPR. Regulation (eu) 2016/679 of the european parliament and of the council of 27 april 2016 on the  
558 protection of natural persons with regard to the processing of personal data and on the free movement  
559 of such data, and repealing directive 95/46/ec (general data protection regulation), 2016. URL <https://eur-lex.europa.eu/eli/reg/2016/679/oj>.
- 560
- 561 Google LLC. How google retains data we collect. Google, 2025. URL <https://policies.google.com/technologies/retention?hl=en-US>. Accessed January 29, 2025.
- 562
- 563 Francesco Gullo, Domenico Mandaglio, and Andrea Tagarelli. A combinatorial multi-armed bandit  
564 approach to correlation clustering. *Data Min. Knowl. Discov.*, 37(4):1630–1691, 2023. doi:  
565 10.1007/S10618-023-00937-5. URL <https://doi.org/10.1007/s10618-023-00937-5>.

- 564 Yuchen He, Zichun Ye, and Chihao Zhang. Understanding memory-regret trade-off for streaming stochastic  
565 multi-armed bandits. In *Proceedings of the 2025 ACM-SIAM Symposium on Discrete Algorithms, SODA*  
566 *2025*, 2025. doi: 10.48550/ARXIV.2405.19752. URL [https://doi.org/10.48550/arXiv.](https://doi.org/10.48550/arXiv.2405.19752)  
567 [2405.19752](https://doi.org/10.48550/arXiv.2405.19752).
- 568 Tianyuan Jin, Keke Huang, Jing Tang, and Xiaokui Xiao. Optimal streaming algorithms for multi-armed  
569 bandits. In Marina Meila and Tong Zhang (eds.), *Proceedings of the 38th International Conference*  
570 *on Machine Learning, ICML 2021, 18-24 July 2021, Virtual Event*, volume 139 of *Proceedings of Ma-*  
571 *chine Learning Research*, pp. 5045–5054. PMLR, 2021. URL [http://proceedings.mlr.press/  
572 v139/jin21a.html](http://proceedings.mlr.press/v139/jin21a.html).
- 573 Zohar Shay Karnin, Tomer Koren, and Oren Somekh. Almost optimal exploration in multi-armed bandits. In  
574 *Proceedings of the 30th International Conference on Machine Learning, ICML 2013, Atlanta, GA, USA,*  
575 *16-21 June 2013*, volume 28 of *JMLR Workshop and Conference Proceedings*, pp. 1238–1246. JMLR.org,  
576 2013. URL <http://proceedings.mlr.press/v28/karnin13.html>.
- 577 Nikolai Karpov and Chen Wang. Nearly tight bounds for exploration in streaming multi-armed bandits with  
578 known optimality gap. In Toby Walsh, Julie Shah, and Zico Kolter (eds.), *AAAI-25, Sponsored by the*  
579 *Association for the Advancement of Artificial Intelligence, February 25 - March 4, 2025, Philadelphia,*  
580 *PA, USA*, pp. 17788–17796. AAAI Press, 2025. doi: 10.1609/AAAI.V39I17.33956. URL [https:  
581 //doi.org/10.1609/aaai.v39i17.33956](https://doi.org/10.1609/aaai.v39i17.33956).
- 582 Robert Kleinberg, Alexandru Niculescu-Mizil, and Yogeshwer Sharma. Regret bounds for sleeping experts  
583 and bandits. *Machine learning*, 80(2):245–272, 2010.
- 584 David Liau, Zhao Song, Eric Price, and Ger Yang. Stochastic multi-armed bandits in constant space. In  
585 Amos J. Storkey and Fernando Pérez-Cruz (eds.), *International Conference on Artificial Intelligence and*  
586 *Statistics, AISTATS 2018, 9-11 April 2018, Playa Blanca, Lanzarote, Canary Islands, Spain*, volume 84 of  
587 *Proceedings of Machine Learning Research*, pp. 386–394. PMLR, 2018. URL [http://proceedings.  
588 mlr.press/v84/liaul8a.html](http://proceedings.mlr.press/v84/liaul8a.html).
- 589 David E Losada, Javier Parapar, and Alvaro Barreiro. Multi-armed bandits for adjudicating documents in  
590 pooling-based evaluation of information retrieval systems. *Information Processing & Management*, 53(5):  
591 1005–1025, 2017.
- 592 Arnab Maiti, Vishakha Patil, and Arindam Khan. Multi-armed bandits with bounded arm-  
593 memory: Near-optimal guarantees for best-arm identification and regret minimization. In  
594 Marc’Aurelio Ranzato, Alina Beygelzimer, Yann N. Dauphin, Percy Liang, and Jennifer Wort-  
595 man Vaughan (eds.), *Advances in Neural Information Processing Systems 34: Annual Conference*  
596 *on Neural Information Processing Systems 2021, NeurIPS 2021, December 6-14, 2021, virtual*,  
597 pp. 19553–19565, 2021. URL [https://proceedings.neurips.cc/paper/2021/hash/  
598 a2f04745390fd6897d09772b2cd1f581-Abstract.html](https://proceedings.neurips.cc/paper/2021/hash/a2f04745390fd6897d09772b2cd1f581-Abstract.html).
- 599 Shie Mannor and John N Tsitsiklis. The sample complexity of exploration in the multi-armed bandit problem.  
600 *Journal of Machine Learning Research*, 5(Jun):623–648, 2004.
- 601 Philip Pallmann, Alun W Bedding, Babak Choodari-Oskoei, Munyaradzi Dimairo, Laura Flight, Lisa V  
602 Hampson, Jane Holmes, Adrian P Mander, Lang’o Odoni, Matthew R Sydes, et al. Adaptive designs in  
603 clinical trials: why use them, and how to run and report them. *BMC medicine*, 16:1–15, 2018.
- 604 Filip Radlinski, Robert Kleinberg, and Thorsten Joachims. Learning diverse rankings with multi-armed  
605 bandits. In William W. Cohen, Andrew McCallum, and Sam T. Roweis (eds.), *Machine Learning,*  
606 *Proceedings of the Twenty-Fifth International Conference (ICML 2008), Helsinki, Finland, June 5-9,*  
607

- 611 2008, volume 307 of *ACM International Conference Proceeding Series*, pp. 784–791. ACM, 2008. doi:  
612 10.1145/1390156.1390255. URL <https://doi.org/10.1145/1390156.1390255>.
- 613
- 614 Herbert Robbins. Some aspects of the sequential design of experiments. *Bulletin of the American Mathemati-*  
615 *cal Society*, 55:527–535, 1952.
- 616
- 617 Weiwei Shen, Jun Wang, Yu-Gang Jiang, and Hongyuan Zha. Portfolio choices with orthogonal bandit  
618 learning. In Qiang Yang and Michael J. Wooldridge (eds.), *Proceedings of the Twenty-Fourth International*  
619 *Joint Conference on Artificial Intelligence, IJCAI 2015, Buenos Aires, Argentina, July 25-31, 2015*, pp. 974.  
620 AAAI Press, 2015. URL <http://ijcai.org/Abstract/15/142>.
- 621
- 622 David Simchi-Levi and Chonghuan Wang. Multi-armed bandit experimental design: Online decision-making  
623 and adaptive inference. In Francisco J. R. Ruiz, Jennifer G. Dy, and Jan-Willem van de Meent (eds.),  
624 *International Conference on Artificial Intelligence and Statistics, 25-27 April 2023, Palau de Congressos,*  
625 *Valencia, Spain*, volume 206 of *Proceedings of Machine Learning Research*, pp. 3086–3097. PMLR, 2023.  
626 URL <https://proceedings.mlr.press/v206/simchi-levi23a.html>.
- 627
- 628 Yufei Tao and Dimitris Papadias. Maintaining sliding window skylines on data streams. *IEEE Trans. Knowl.*  
629 *Data Eng.*, 18(2):377–391, 2006. doi: 10.1109/TKDE.2006.48. URL [https://doi.org/10.1109/](https://doi.org/10.1109/TKDE.2006.48)  
630 [TKDE.2006.48](https://doi.org/10.1109/TKDE.2006.48).
- 631
- 632 Francesco Trovò, Stefano Paladino, Marcello Restelli, and Nicola Gatti. Improving multi-armed bandit  
633 algorithms in online pricing settings. *International Journal of Approximate Reasoning*, 98:196–235, 2018.
- 634
- 635 Chen Wang. Tight regret bounds for single-pass streaming multi-armed bandits. In Andreas Krause, Emma  
636 Brunskill, Kyunghyun Cho, Barbara Engelhardt, Sivan Sabato, and Jonathan Scarlett (eds.), *International*  
637 *Conference on Machine Learning, ICML 2023, 23-29 July 2023, Honolulu, Hawaii, USA*, volume 202  
638 of *Proceedings of Machine Learning Research*, pp. 35525–35547. PMLR, 2023. URL [https://](https://proceedings.mlr.press/v202/wang23a.html)  
639 [proceedings.mlr.press/v202/wang23a.html](https://proceedings.mlr.press/v202/wang23a.html).
- 640
- 641 Peter Whittle. Arm-acquiring bandits. *The Annals of Probability*, 9(2):284–292, 1981.
- 642
- 643 Peter Whittle. Restless bandits: Activity allocation in a changing world. *Journal of applied probability*, 25  
644 (A):287–298, 1988.
- 645
- 646 David P. Woodruff, Peilin Zhong, and Samson Zhou. Near-optimal k-clustering in the sliding win-  
647 dow model. In Alice Oh, Tristan Naumann, Amir Globerson, Kate Saenko, Moritz Hardt, and  
648 Sergey Levine (eds.), *Advances in Neural Information Processing Systems 36: Annual Conference*  
649 *on Neural Information Processing Systems 2023, NeurIPS 2023, New Orleans, LA, USA, December*  
650 *10 - 16, 2023*, 2023. URL [http://papers.nips.cc/paper\\_files/paper/2023/hash/](http://papers.nips.cc/paper_files/paper/2023/hash/476ab8f369e489c04187ba84f68cfa68-Abstract-Conference.html)  
651 [476ab8f369e489c04187ba84f68cfa68-Abstract-Conference.html](http://papers.nips.cc/paper_files/paper/2023/hash/476ab8f369e489c04187ba84f68cfa68-Abstract-Conference.html).
- 652
- 653 Andrew Chi-Chih Yao. Probabilistic computations: Toward a unified measure of complexity. *18th Annual*  
654 *Symposium on Foundations of Computer Science (sfcs 1977)*, pp. 222–227, 1977. URL [https://api.](https://api.semanticscholar.org/CorpusID:143169)  
655 [semanticscholar.org/CorpusID:143169](https://api.semanticscholar.org/CorpusID:143169).
- 656
- 657
- 658
- 659
- 660
- 661
- 662
- 663
- 664
- 665
- 666
- 667
- 668
- 669
- 670
- 671
- 672
- 673
- 674
- 675
- 676
- 677
- 678
- 679
- 680
- 681
- 682
- 683
- 684
- 685
- 686
- 687
- 688
- 689
- 690
- 691
- 692
- 693
- 694
- 695
- 696
- 697
- 698
- 699
- 700
- Chao Zhang, Angela Bonifati, and M. Tamer Özsu. Incremental sliding window connectivity over streaming  
graphs. *Proc. VLDB Endow.*, 17(10):2473–2486, 2024. doi: 10.14778/3675034.3675040. URL [https://](https://www.vldb.org/pvldb/vol17/p2473-zhang.pdf)  
[www.vldb.org/pvldb/vol17/p2473-zhang.pdf](https://www.vldb.org/pvldb/vol17/p2473-zhang.pdf).
- Liangwei Zhang, Jing Lin, and Ramin Karim. Sliding window-based fault detection from high-dimensional  
data streams. *IEEE Transactions on Systems, Man, and Cybernetics: Systems*, 47(2):289–303, 2016.

## A TECHNICAL PRELIMINARIES

We give some technical preliminaries of our paper in this section.

**Concentration inequalities.** We use some standard concentration inequalities in the proof of our results. We provide these inequalities for completeness.

**Proposition A.1** (Chernoff-Hoeffding bound). *Let  $X_1, X_2, \dots, X_m$  be a sequence of independent discrete random variables bounded in the range  $[0, 1]$ . Define  $S_m = \sum_{i=1}^m X_i$ , then*

$$\Pr [|S_m - \mathbb{E}[S_m]| \geq t] \leq 2 \cdot \exp\left(-\frac{2t^2}{m}\right).$$

We also use the following direct corollaries of the Chernoff-Hoeffding bound.

**Proposition A.2.** *Let  $\text{arm}$  be an arms with mean  $\mu$ . We pull the arm  $\frac{K}{\theta^2}$  times to obtain empirical mean  $\hat{\mu}$ . Then,*

$$\Pr [|\mu - \hat{\mu}| \geq \theta] \leq 2 \cdot \exp(-2K).$$

**Proposition A.3.** *Let  $\text{arm}_1$  and  $\text{arm}_2$  be two different arms with means  $\mu_1$  and  $\mu_2$ . Suppose  $\mu_1 - \mu_2 \geq \theta > 0$  and we pull each arm  $\frac{K}{\theta^2}$  times to obtain empirical rewards  $\hat{\mu}_1$  and  $\hat{\mu}_2$ . Then,*

$$\Pr [\hat{\mu}_1 \leq \hat{\mu}_2] \leq 2 \cdot \exp\left(-\frac{K}{4}\right).$$

## B ADDITIONAL RELATED WORK

Apart from the streaming MABs algorithms, our work is also closely related to settings with evolving and expiring arms, including arm-acquiring bandits Whittle (1981), non-stationary bandits Whittle (1988), mortal bandits Chakrabarti et al. (2008), and the sleeping expert problems Kleinberg et al. (2010). For instance, in the mortal bandits problem, the arm can expire after a certain number of samples, or it goes expiring with some probability at each step. We remark that although these settings are in a similar spirit of arm expiration, their settings are not directly comparable with ours since we always prioritize the most recent arms in the sliding-window model. Furthermore, none of these problems considered *memory* constraints, which means their algorithms cannot be directly applied in our setting.

## C THE COMPLETE DETAILS FOR RESULTS IN SECTION 4

In this section, we provide the complete details (missing algorithms and analysis) we discussed in Section 4.

### C.1 THE ANALYSIS OF THEOREM 2 AND ALGORITHM 1

We now proceed to the analysis of Algorithm 1. The following lemma establishes the *space complexity* of the algorithm.

**Lemma C.1.** *The space complexity of BUCKET  $\left(\frac{9}{2\varepsilon^2} \ln \frac{6W}{\delta}\right)$  is  $O\left(\frac{1}{\varepsilon}\right)$ .*

*Proof.* Since we discard the previous arm when storing a new arm in a bucket, each bucket will contain at most one arm during the execution of the algorithm. Therefore, the space complexity of the algorithm is bounded by  $N = \frac{3}{\varepsilon}$ , which is  $O\left(\frac{1}{\varepsilon}\right)$ .  $\square$

The following lemma provides a bound on the sample complexity of the algorithm.

**Lemma C.2.** *The sample complexity of BUCKET  $(\frac{9}{2\varepsilon^2} \ln \frac{6W}{\delta})$  is  $O(\frac{n}{\varepsilon^2} \log \frac{W}{\delta})$ .*

*Proof.* Since we sample each arm  $l = \frac{9}{2\varepsilon^2} \ln \frac{6W}{\delta}$  times within the algorithm, the *sample complexity* is given by  $n \cdot l = O(\frac{n}{\varepsilon^2} \log \frac{W}{\delta})$ .  $\square$

Finally, we prove the correctness of the algorithm.

**Lemma C.3.** *At any time  $t \in [n]$ , the arm  $\widehat{\text{arm}}_t$  outputted by the algorithm BUCKET  $(\frac{9}{2\varepsilon^2} \ln \frac{6W}{\delta})$  is an  $\varepsilon$ -best arm for  $\text{arm}^*(t, W)$  with a probability of at least  $1 - \delta$ .*

*Proof.* At any time  $t \in [n]$ , let  $\text{arm}^*(t, W) = \text{arm}_k$  and  $\widehat{\text{arm}}_t = \text{arm}_m$ . Additionally, let  $b_i$  be the index of the correct bucket to which  $\text{arm}_i$  belongs; that is,  $\mu_i \in (b_i - 1)\frac{\varepsilon}{3}, b_i\frac{\varepsilon}{3}]$ . We also define  $b'_i$  as the index of the bucket where  $\text{arm}_i$  is stored upon arrival; thus,  $\widehat{\mu}_i \in ((b'_i - 1)\frac{\varepsilon}{3}, b'_i\frac{\varepsilon}{3}]$ .

Let  $\mathcal{E}_i$  be the event that  $|b_i - b'_i| \leq 1$ , indicating that  $\text{arm}_i$  is stored in a bucket close to its correct bucket. By Lemma A.2, we have

$$\begin{aligned} \Pr[-\mathcal{E}_i] &= \Pr[|b_i - b'_i| > 1] \\ &\leq \Pr\left[|\widehat{\mu}_i - \mu_i| > \frac{\varepsilon}{3}\right] \\ &\leq 2 \cdot \exp\left(-2l \cdot \frac{\varepsilon^2}{9}\right) = \frac{\delta}{3W}. \end{aligned}$$

The output  $\widehat{\text{arm}}_t$  must be an  $\varepsilon$ -best arm if the following events occur at time  $t$ :

- $\mathcal{F}_1$ : There exists some arms stored in  $B_{b_k-1} \cup B_{b_k} \cup B_{b_k+1}$ ;
- $\mathcal{F}_2$ : All the bucket  $B_j$  for  $j > b_k + 1$  are empty;
- $\mathcal{F}_3$ :  $|b_m - b'_m| \leq 1$ .

We will output an arm from  $\{B_{b_k-1}, B_{b_k}, B_{b_k+1}\}$  if both  $\mathcal{F}_1$  and  $\mathcal{F}_2$  hold.  $\mathcal{F}_3$  guarantees that the output  $\widehat{\text{arm}}_t$  is stored in a bucket close to its correct bucket. If all three events occur simultaneously, we have  $b'_m \in \{b_k - 1, b_k, b_k + 1\}$  and  $|b'_m - b_m| \leq 1$ . Therefore,  $|b_m - b_k| \leq 2$ , leading to  $|\mu_k - \mu_m| \leq 3 \cdot \frac{\varepsilon}{3} = \varepsilon$ . This means that  $\widehat{\text{arm}}_t$  is an  $\varepsilon$ -approximation of  $\text{arm}^*(t, W)$ .

We can analyze the probabilities of each event:

$\Pr[\mathcal{F}_1] \geq \Pr[\mathcal{E}_k] \geq 1 - \frac{\delta}{3W}$ . This is because if  $\mathcal{E}_k$  occurs, we will store  $\text{arm}^*(t, W) = \text{arm}_k$  in bucket  $B_{b'_k}$ , where  $|b'_k - b_k| \leq 1$ . Since  $\text{arm}^*(t, W)$  is the best arm at time  $t$ , it cannot expire, implying we will not drop the arm stored in  $B_{b'_k}$  due to expiration. Thus,  $B_{b'_k}$  remains non-empty.

$\Pr[\mathcal{F}_2] \geq \Pr[\cup_{j=t-W+1}^t \mathcal{E}_j] \geq 1 - W \cdot \frac{\delta}{3W}$ . If all  $\mathcal{E}_j, j \in [t - W + 1, t]$  occur, each arm will be stored in a bucket near its correct bucket. Since  $\text{arm}^*(t, W) = \text{arm}_k$  is the best arm at time  $t$ , we have  $b_j \leq b_k$  for any  $j \in [t - W + 1, t]$ . Therefore,  $b'_j \leq b_k + 1$  for any  $j$  when  $\mathcal{E}_j$  occurs, thus ensuring all buckets  $B_j$  for  $j > b_k + 1$  are empty.

$\mathcal{F}_3$  is simply the same event as  $\mathcal{E}_m$ , so  $\Pr[\mathcal{F}_3] \geq 1 - \frac{\delta}{3W}$ .

Consequently, we obtain:

$$\Pr[\mathcal{F}_1 \cap \mathcal{F}_2 \cap \mathcal{F}_3] \geq 1 - (2 + W) \cdot \frac{\delta}{3W} \geq 1 - \delta.$$

$\square$

752 C.2 THE ANALYSIS OF LEMMA 4.1  
753

754 We now prove Lemma 4.1 with the general  $\Omega(\frac{n}{\varepsilon^2} \cdot \log \frac{n}{W})$  sample lower bound (this directly implies the lower  
755 bound when  $W \leq n^{0.99}$ ). We will employ the *sample complexity* lower bound established by Mannor &  
756 Tsitsiklis (2004) to prove our lemma. We provide the proposition for completeness.

757 **Proposition C.4** (Mannor & Tsitsiklis (2004)). *There exist positive constants  $c_1, c_2, \varepsilon_0$  and  $\delta_0$ , such that for*  
758 *every  $n \geq 2$ ,  $\varepsilon \in (0, \varepsilon_0)$  and  $\delta \in (0, \delta_0)$ , and for every algorithm outputs  $\varepsilon$ -best arm with probability at least*  
759  *$1 - \delta$ , there exists some  $\mu = (\mu_1, \mu_2, \dots, \mu_n) \in [0, 1]^n$  such that*

$$760 \mathbb{E}_\mu [T] \geq c_1 \frac{n}{\varepsilon^2} \log \left( \frac{c_2}{\delta} \right).$$

761  *$T$  is the number of pulls used in the algorithm.  $\mathbb{E}_\mu [T]$  is the expectation of  $T$  when arms have means*  
762  *$\mu = (\mu_1, \mu_2, \dots, \mu_n)$ .*

763 *In particular,  $\varepsilon_0$  and  $\delta_0$  can be taken equal to  $1/8$  and  $\frac{e^{-4}}{4}$ , respectively.*

764 We assert that any algorithm capable of solving the *strong*  $\varepsilon$  exploration for a stream of  $n$  arms, with a window  
765 size  $W$ , and achieving a success probability of at least  $99/100$ , modified to create an algorithm that addresses  
766  $\Theta(\frac{n}{W})$  independent  $\varepsilon$  exploration of  $W$  arms concurrently, also with a success probability of at least  $99/100$ .  
767 Moreover, the *sample complexity* of the latter algorithm will be less than or equal to the *sample complexity* of  
768 the former algorithm.

769 Specifically, consider sets  $X_i$ , for  $i \in [\frac{n}{2W}]$ , are  $\frac{n}{2W}$  sets, where each set  $X_i$  consists of  $W$  arms. Let  
770  $Z$  denote a set that contains  $W$  arms, each of which consistently returns 0. We can construct a stream  
771  $S = (Z, X_1, Z, X_2, \dots, Z, X_{\frac{n}{2W}})$ . By employing an algorithm designed to solve the *strong*  $\varepsilon$  exploration  
772 task on the stream  $S$ , we can simultaneously solve the  $\varepsilon$  exploration problem for all sets  $X_i$ .

773 **Lemma C.5.** *If an algorithm ALG exists that successfully solves the strong  $\varepsilon$  exploration problem for a*  
774 *stream of  $n$  arms with a window size  $W$  with a probability of at least  $99/100$ , and has a sample complexity*  
775  *$m$ , then there exists another algorithm ALG' that can solve  $\frac{n}{2W}$  independent  $\varepsilon$  exploration problems for  $W$*   
776 *arms simultaneously. This new algorithm ALG' will have a sample complexity  $m'$  such that  $m' \leq m$ , while*  
777 *also achieving a success probability of at least  $99/100$ .*

778 *Proof.* We demonstrate the lemma by providing a framework, Algorithm 2, which generates the algorithm  
779 ALG' based on the algorithm ALG.

780 By the construction of  $S$ , an  $\varepsilon$ -best arm at time  $i \cdot 2W$  must also be an  $\varepsilon$ -best arm among the set  $\{\widehat{\text{arm}}_{i,j}\}_{j \in [W]}$ .  
781 Consequently, if ALG successfully solves the *strong*  $\varepsilon$  exploration problem on  $S$ , then the set  $\{\widehat{\text{arm}}_i\}_{i \in [\frac{n}{2W}]}$   
782 must be the  $\varepsilon$ -best arm for the arms  $\{\text{arm}_{i,j}\}_{i \in [\frac{n}{2W}], j \in [W]}$ . Since ALG accomplishes the *strong*  $\varepsilon$  exploration  
783 task on  $S$  with a probability of at least  $99/100$ , it follows that ALG' solves the pure exploration problem on  
784 the arms  $\{\text{arm}_{i,j}\}_{i \in [\frac{n}{2W}], j \in [W]}$  with the same probability.

785 Furthermore, since  $\text{arm}_0$  is merely a virtual arm, the actual number of pulls by ALG' is equivalent to the pulls  
786 used on the real arms  $\{\text{arm}_{i,j}\}_{i \in [\frac{n}{2W}], j \in [W]}$ . Therefore, the number of pulls made by ALG' is at most equal  
787 to the number of pulls made by ALG when solving the *strong*  $\varepsilon$  exploration problem on  $S$ . Hence, we can  
788 conclude that  $m' \leq m$ .  $\square$

789 The following is a technical lemma that states a ‘‘direct sum’’ type of bound for solving  $k$  independent copies  
790 of the same problem.

791 **Lemma C.6.** *Let  $f$  be a function to compute, and let  $\mathcal{H}$  be a distribution from which the inputs of  $f$  are*  
792 *sampled. Suppose that solving  $f$  over the distribution  $\mathcal{H}$  with probability  $1 - \delta$  takes  $\Omega(q \cdot \log(\frac{1}{\delta}))$  queries on*  
793

**Algorithm 2:** ALG': Algorithm Transformation**Input:** Arms  $\{\text{arm}_{i,j}\}_{i \in [\frac{n}{2W}], j \in [W]}$ , algorithm ALG;**Output:** A set of arms  $\{\widehat{\text{arm}}_i\}_{i \in [\frac{n}{2W}]}$ , where  $\widehat{\text{arm}}_i$  is an  $\varepsilon$ -best arm of  $\{\widehat{\text{arm}}_{i,j}\}_{j \in [W]}$ ;Let  $\text{arm}_0$  be the arm always return 0;

```

for  $i \leftarrow 1$  to  $\frac{n}{2W}$  do
  for  $j \leftarrow 1$  to  $W$  do
     $\text{arm}'_{(i-1) \cdot 2W + j} \leftarrow \text{arm}_0$ ;
     $\text{arm}'_{i \cdot 2W + j} \leftarrow \text{arm}_{i,j}$ ;
  end

```

**end**Build stream  $S = \{\text{arm}'_k\}_{k=1}^n$ ; $\{\widehat{\text{arm}}_k\}_{k=1}^n \leftarrow \text{ALG}(S)$ ;**for**  $i \leftarrow 1$  **to**  $\frac{n}{2W}$  **do**|  $\widehat{\text{arm}}_i \leftarrow \text{arm}_{i \cdot 2W}$ ;**end****return**  $\{\widehat{\text{arm}}_i\}_{i \in [\frac{n}{2W}]}$ 

the input. Furthermore, let  $\tilde{\mathcal{H}} = (\mathcal{H}_1, \mathcal{H}_2, \dots, \mathcal{H}_k)$  be a distribution over  $k$  independent copies of  $\mathcal{H}$ . Then, any algorithm ALG that computes  $f$  on all copies with probability at least  $99/100$  has to make  $\Omega(k \cdot q \cdot \log k)$  total queries.

*Proof.* The lemma follows from a direct calculation of the success probability, and we provide the proof for the purpose of completeness. Define  $\mathcal{E}_i, i \in [k]$  as the event that ALG successfully computes  $f$  on the  $i$ -th copy of  $\mathcal{H}$ , and define  $\mathcal{E}$  as the event that all copies of  $f$  are correctly computed. We have that

$$\begin{aligned}
\Pr(\mathcal{E}) &= \Pr\left(\bigcap_{i=1}^k \mathcal{E}_i\right) \\
&= \prod_{i=1}^k \Pr(\mathcal{E}_i \mid \bigcap_{j=1}^{i-1} \mathcal{E}_j) && \text{(by the law of total probability)} \\
&= \prod_{i=1}^k \Pr(\mathcal{E}_i). && \text{(by the independence)}
\end{aligned}$$

Therefore, by using the condition that success probability is at least  $99/100$ , we have that

$$\sum_{i=1}^k \log(\Pr(\mathcal{E}_i)) = \log(\Pr(\mathcal{E})) \geq \sigma - 1$$

for some  $\sigma \in (0.9, 1)$ . We claim that for each least  $k/100$  indices of  $i \in [k]$ , there must be  $\log(\Pr(\mathcal{E}_i)) \geq \log(1 - \frac{\sigma}{k})$ . Otherwise, the total success probability is at most

$$\begin{aligned}
\frac{99k}{100} \cdot \log\left(1 - \frac{\sigma}{k}\right) + \frac{k}{100} \cdot \log(1) &= \frac{99k}{100} \cdot \left(\frac{\ln(1 - \frac{\sigma}{k})}{\ln 2}\right) \\
&\leq \frac{99k}{100 \ln 2} \cdot \left(-\frac{\sigma}{k}\right) && \text{(using } \ln(1+x) \leq x \text{)} \\
&= -\frac{99\sigma}{100 \ln 2} < -1.28 < \sigma - 1. && \text{(by } \sigma > 0.9 \text{)}
\end{aligned}$$

846 Since solving each  $f$  with probability  $1 - \delta$  requires  $\Omega(q \cdot \log(\frac{1}{\delta}))$  queries, solving  $k/100$  indices with  
 847 probability at least  $1 - \sigma/k$  requires

$$848 \frac{k}{100} \cdot q \cdot \log\left(\frac{k}{\sigma}\right) = \Omega(k \cdot q \cdot \log k)$$

849 queries, which is as desired.  $\square$

850  
 851  
 852 **Finalizing the proof of Lemma 4.1.** Consider any algorithm  $\text{ALG}$  that successfully solves the *strong*  $\varepsilon$  ex-  
 853 ploration problem with a probability of at least  $99/100$  on  $\mathcal{D}(n, W, \varepsilon)$ . Let  $T_{\text{ALG}}$  represent the number of  
 854 pulls executed by this algorithm. We will define  $\text{ALG}'$  as the algorithm derived from  $\text{ALG}$  using Algorithm 2,  
 855 and let  $T_{\text{ALG}'}$  be the corresponding number of pulls for  $\text{ALG}'$ .

856 According to Lemma C.5,  $\text{ALG}'$  is capable of solving  $\frac{n}{2W}$  independent  $\varepsilon$  exploration tasks involving  $W$  arms  
 857 simultaneously, and it holds that  $\mathbb{E}[T_{\text{ALG}'}] \leq \mathbb{E}[T_{\text{ALG}}]$ .

858 Since it is necessary to make  $\Omega\left(\frac{W}{\varepsilon^2} \cdot \log\left(\frac{1}{\delta}\right)\right)$  pulls to solve the  $\varepsilon$  exploration of  $W$  arms with a probability  
 859 of at least  $1 - \delta$ , we can employ Lemma C.6 to conclude that  $\Omega\left(\frac{n}{\varepsilon^2} \log \frac{n}{W}\right)$  samples are required for the  
 860 algorithm  $\text{ALG}$ .  $\square$

### 861 C.3 THE ANALYSIS FOR LEMMA 4.2

862  
 863 The algorithm is still Algorithm 1. We employ a larger pulling size of  $l = \frac{9}{2\varepsilon^2} \ln \frac{6n}{\delta}$  compared to the weak  
 864 exploration. This adjustment allows us to effectively apply a union bound across  $n$  arms. The increased  
 865 pulling size not only ensures that we can accurately identify all the  $\varepsilon$ -best arms simultaneously with high  
 866 probability, but it also results in higher sample complexity.

867 The following claim establishes bounds on both the *space complexity* and *sample complexity* of this algorithm.

868  
 869 **Lemma C.7.** *The space complexity of the BUCKET  $\left(\frac{9}{2\varepsilon^2} \ln \frac{6n}{\delta}\right)$  is  $O\left(\frac{1}{\varepsilon}\right)$ , and the sample complexity is*  
 870  $O\left(\frac{n}{\varepsilon^2} \log \frac{n}{\delta}\right)$ .

871  
 872 The proof follows the same reasoning as the proofs of Lemma C.1 and Lemma C.2, and we skip the details to  
 873 avoid repetitions. Next, we will demonstrate the correctness of the algorithm. We use the notation  $\mu(\text{arm})$   
 874 to denote the mean of the arm.

875  
 876 **Lemma C.8.** *Let  $A = \{\widehat{\text{arm}}_t\}_{t=1}^n$  be the set of arms outputted by the algorithm, and let  $A' =$   
 877  $\{\text{arm}^*(W, t)\}_{t=1}^n$  represent the set of best arms. Then, with a probability of at least  $1 - \delta$ , it holds that*  
 878  $\mu(\widehat{\text{arm}}_t) \geq \mu(\text{arm}^*(W, t)) - \varepsilon$  for all time  $t \in [n]$ .

879  
 880 *Proof.* Let  $b_i$  denote the index of the correct bucket to which arm  $\text{arm}_i$  belongs. In other words, we have  
 881  $\mu_i \in \left((b_i - 1)\frac{\varepsilon}{3}, b_i\frac{\varepsilon}{3}\right]$ . We define  $b'_i$  as the index of the bucket where  $\text{arm}_i$  is stored upon its arrival, which  
 882 implies  $\widehat{\mu}_i \in \left((b'_i - 1)\frac{\varepsilon}{3}, b'_i\frac{\varepsilon}{3}\right]$ .

883 Let  $\mathcal{E}_i$  be the event that  $|b_i - b'_i| \leq 1$ , indicating that  $\text{arm}_i$  is stored in a bucket close to its correct bucket.  
 884 According to Lemma A.2, we have:

$$885 \Pr[\neg \mathcal{E}_i] = \Pr[|b_i - b'_i| > 1] \leq \Pr\left[|\widehat{\mu}_i - \mu_i| > \frac{\varepsilon}{3}\right] \leq 2 \cdot \exp\left(-2l \cdot \frac{\varepsilon^2}{9}\right) = \frac{\delta}{3n}.$$

886  
 887 By applying the union bound, we can express this as:

$$888 \Pr\left[\bigcap_{i=1}^n \mathcal{E}_i\right] = 1 - \Pr\left[\bigcap_{i=1}^n \neg \mathcal{E}_i\right] = 1 - \Pr\left[\bigcup_{i=1}^n \neg \mathcal{E}_i\right] \quad (\text{By De Morgan's Law})$$

$$889 \geq 1 - \sum_{i=1}^n \Pr[\neg \mathcal{E}_i] \geq 1 - \sum_{i=1}^n \frac{\delta}{3n} = 1 - \frac{\delta}{3}.$$

893 If the event  $\cap_{i=1}^n \mathcal{E}_i$  occurs, it means each arm is placed in a bucket  $b'_i$  that is close to its correct bucket  $b_i$ ,  
 894 satisfying  $|b_i - b'_i| \leq 1$ .

895 For any  $t \in [n]$ , suppose that  $\widehat{\text{arm}}_t = \text{arm}_{i_t}$  and  $\text{arm}^*(W, t) = \text{arm}_{j_t}$ . Therefore, we have  $|b_{i_t} - b'_{i_t}| \leq 1$   
 896 and  $|b_{j_t} - b'_{j_t}| \leq 1$ . Additionally, since  $\text{arm}^*(W, t) = \text{arm}_{j_t}$  does not expire at time  $t$ , it follows that the  
 897 bucket  $B_{j_t} \neq \emptyset$  at time  $t$ . Given that the arm returned by the algorithm at time  $t$  is  $\widehat{\text{arm}}_t = \text{arm}_{i_t}$ , it must be  
 898 that  $b'_{i_t} \geq b'_{j_t}$ . Thus, we can derive:  
 899

$$900 \quad b_{i_t} \geq b'_{i_t} - 1 \geq b'_{j_t} - 1 \geq b_{j_t} - 2.$$

901 Consequently, we obtain  $\mu(\widehat{\text{arm}}_t) \geq \mu(\text{arm}^*(W, t)) - \frac{2}{3}\varepsilon$ . □

## 902 D THE COMPLETE DETAILS FOR RESULTS IN SECTION 5

903 We provide the proof of Theorem 3 in this section.

904 *Proof.* We proceed with the lower bound proof first. According to Yao's minimax principle Yao (1977), it is  
 905 sufficient to establish the lower bound for deterministic algorithms under a challenging distribution of inputs.  
 906 Consider the following distribution of  $n$  arms.

907 **EPOCH( $n, W$ ): A hard distribution with  $n$  arms for epoch-wise regret minimization**

- 908 1. For  $i = k \cdot 2W + j$ , where  $j \in [W]$ ,  $\mu_i = 1 - \frac{j}{W}$ .
- 909 2. With probability  $\frac{1}{W}$ , choose  $h \in [W]$  uniformly. For  $i = k \cdot 2W + W + j$ , where  $j \in [W]$ ,  
 910  $\mu_i = 1 - \frac{2h+1}{2W}$ .

911 Since we have only  $\frac{W-1}{2}$  space available, there exists an arm  $\text{arm}_i$  where  $i \in [k \cdot 2W + 1, k \cdot 2W + W]$   
 912 that we cannot store at time  $k \cdot 2W + W$ . Let  $\mathcal{E}_i$  be the event where the  $W$  subsequent arms all have the  
 913 same mean of  $1 - \frac{2h+1}{2W}$ , with  $h \equiv i \pmod{2W}$ , but  $\text{arm}_i$  is not stored at time  $k \cdot 2W + W$ . When event  $\mathcal{E}_k$   
 914 occurs,  $\text{arm}_i$  is the best arm at time  $i + W - 1$ . As we missed  $\text{arm}_i$ , this will induce at least  $\frac{1}{2W} \cdot \frac{T}{n-W+1}$   
 915 regret during this epoch.

916 Let

$$917 \quad \mathcal{F}_k = \bigcup_{i=k \cdot 2W + 1}^{k \cdot 2W + W} \mathcal{E}_i.$$

918 The event  $\mathcal{F}_k$  represents that at least one of the events  $\mathcal{E}_i$  occurs between the times  $[k \cdot 2W + 1, (k + 1) \cdot 2W]$ .  
 919 Since at least half of the arms among  $\{\text{arm}_{k \cdot 2W + 1}, \dots, \text{arm}_{k \cdot 2W + W}\}$  are not stored at time  $k \cdot 2W + W$ ,  
 920 we have  $\Pr[\mathcal{F}_k] \geq \frac{1}{2}$ .

921 Let  $X_k$  be the random variable indicating whether  $\mathcal{F}_k$  occurs. The total number of such events that occur is  
 922  $Y = \sum_{k=1}^m X_k$ , where  $m = \lfloor \frac{n}{2W} \rfloor$ . Since  $X_i$  are independent Bernoulli random variables with probability  
 923  $p \geq \frac{1}{2}$ ,  $Y$  follows a binomial distribution  $Y \sim \text{Bino}(m, p)$ . Let  $Z \sim \text{Bino}(m, \frac{1}{2})$ .

940 We can analyze the probability as follows:

$$\begin{aligned}
 941 \quad \Pr \left[ Y \leq \frac{m}{4} \right] &\leq \Pr \left[ Z \leq \frac{m}{4} \right] && \text{(since } p \geq \frac{1}{2} \text{)} \\
 942 & \\
 943 & \\
 944 \quad &\leq \Pr \left[ \left| Z - \frac{m}{2} \right| \geq \frac{m}{4} \right] \leq \frac{4}{m} && \text{(by Chebyshev's inequality)} \\
 945 & \\
 946 \quad &\leq \frac{1}{2}. && \text{(because } m = \lfloor \frac{n}{2W} \rfloor \text{ and } n \geq 16W \text{)} \\
 947 &
 \end{aligned}$$

948 Let  $\mathcal{G}$  be the event that  $Y \geq \frac{m}{4}$ . Then we have:

$$949 \quad \mathbb{E}[R_T] = \mathbb{E}[R_T | \mathcal{G}] \cdot \Pr[\mathcal{G}] + \mathbb{E}[R_T | \neg\mathcal{G}] \cdot \Pr[\neg\mathcal{G}] \geq \mathbb{E}[R_T | \mathcal{G}] \cdot \frac{1}{2}.$$

950 Since at least  $\frac{m}{4}$  of the events  $\mathcal{F}_k$  occur when  $\mathcal{G}$  occurs, and each event  $\mathcal{F}_k$  induces at least  $\frac{1}{2W} \cdot \frac{T}{n-W+1}$  regret, we have:

$$951 \quad \mathbb{E}[R_T | \mathcal{G}] \geq \frac{m}{4} \cdot \frac{1}{2W} \cdot \frac{T}{n-W+1}.$$

952 Hence, we find:

$$\begin{aligned}
 953 \quad \mathbb{E}[R_T] &\geq \frac{m}{4} \cdot \frac{1}{2W} \cdot \frac{T}{n-W+1} \cdot \frac{1}{2} \geq \frac{m \cdot T}{16 \cdot W \cdot n} \\
 954 & \\
 955 &\geq \frac{n}{4W} \cdot \frac{T}{16 \cdot W \cdot n} && \text{(because } m = \lfloor \frac{n}{2W} \rfloor \geq \frac{n}{4W} \text{)} \\
 956 & \\
 957 &= \frac{T}{64 \cdot W^2}.
 \end{aligned}$$

958 For the upper bound, we proceed by running epoch-wise UCB using the  $W$  memory size. There are algorithms, such as INF Audibert & Bubeck (2009), that can achieve a total regret of  $O(\sqrt{nT})$  in a centralized setting with  $n$  arms. We can utilize such an algorithm as a black box to attain a total regret of  $O(\sqrt{W \cdot (n-W) \cdot T})$ . The strategy is straightforward: we apply the INF algorithm to each epoch of the stream. Since we need to pull  $\frac{T}{n-W+1}$  times for each epoch, this approach will result in a total regret of  $O(\sqrt{WT/(n-W)})$  for each epoch. Consequently, the overall total regret will be  $O(\sqrt{W \cdot (n-W) \cdot T})$ . Theorem 3  $\square$

959 **Remark 2.** Note that the proof in this section naturally generalizes to the setting with *non-uniform* number of samples per epoch. In particular, on the lower bound side, we can uniformly at random sample one window  $i^* \in [k \cdot 2W + 1, k \cdot 2W + W]$  and allocate all the  $T$  samples in the window. With probability at least  $1/2$ , the algorithm cannot store the arm with mean more than  $1 - \frac{2h+1}{2W}$ , which means the induced regret is again at least  $\Omega(T/W)$  in this epoch. For the upper bound with  $\Omega(W)$ -arm memory, if we let  $T_k$  be the number of trials in epoch  $k$ , we can obtain  $O(\sum_{k=1}^{n-W+1} \sqrt{WT_k})$  regret, although the regret bound is less informative.

## 960 E REGRET MINIMIZATION WITH AN EVERLASTING BEST ARM

961 Our main regret notion is based on the *epoch-wise* regret. However, in some practical scenarios, there are cases where the most popular item is not limited by the time horizon. Consider, again, the task of recommending movies to users for entertainment companies. On average, a movie remains in theaters for about 1 to 2 months. However, some exceptionally popular pieces can have a much longer run. For example, *The Sound*

987 *of Music* was screened in theaters for 4 years and 6 months, while *Avatar* stayed for 34 weeks. Therefore,  
 988 when designing a recommendation system for currently showing movies, we can assume a sliding window of  
 989 2 months, but there are some enduring ones that remain popular even after this window has passed.

990 Similar situations occur in other contexts as well. For instance, the song *Lose Control* set a new record by  
 991 spending 107 weeks on the Billboard Hot 100 chart, whereas the average lifespan of a song on the chart is  
 992 typically between 6 and 7 weeks.

993 Inspired by these applications, we also propose another regret model, which we refer to as **regret minimiza-**  
 994 **tion with an everlasting best arm**. In the scenario where there is an everlasting best arm, we can pull this  
 995 best arm even if it appears more than  $W$  time units earlier in the stream. For situations involving such an  
 996 everlasting best arm, there are two slightly different scenarios to consider: whether we are allowed to pull a  
 997 sub-optimal expired arm and get 1 regret, or we could simply get a signal that a sub-optimal arm is expired  
 998 and the sampling operation is disallowed.

#### 1000 E.1 REGRET MINIMIZATION WITH EVERLASTING BEST ARM AND EXPLICIT VALID FLAG

1001  
 1002 The first scenario is when we cannot pull an expired arm other than the best arm. This means that the only  
 1003 arms available for pulling are the everlasting best arm and the  $W$  most recent arms, and all expired arms  
 1004 (other than the best) in the memory will carry a flag of “being invalid”. A practical example of this scenario  
 1005 might be recommending currently showing movies. If a movie is still being presented by the theater after the  
 1006 sliding-window period, it indicates that the movie has not expired and can still be selected. Therefore, in this  
 1007 setting, we can assume the existence of a flag for each arm indicating whether it is valid for pulling. Only the  
 1008 everlasting best arm and the  $W$  most recent arms will have a positive flag.

1009 **Definition 7** (Valid flag). Let  $\{\text{arm}_i\}_{i=1}^n$  be a collection of  $n$  arms with an everlasting best arm denoted as  
 1010  $\text{arm}^*$ , and let  $W$  be the window size. The valid flag is a function  $\text{flag}(\text{arm}_i, t)$  that returns `True` if  $\text{arm}_i$   
 1011 is  $\text{arm}^*$  or if  $i \geq t - W + 1$  (indicating that  $\text{arm}_i$  is one of the  $W$  most recent arms); it returns `False`  
 1012 otherwise.

1013 In simpler terms,  $\text{flag}(\text{arm}_i, t) = \text{True}$  if and only if  $\text{arm}_i$  is valid at time  $t$ .

1014  
 1015 Next, we define regret minimization with an everlasting best arm and an explicit valid flag. In this setting,  
 1016 the `flag` function is accessible to the algorithm, allowing it to determine whether an arm is valid without  
 1017 needing to pull it. This aligns with scenarios such as recommending movies that are currently showing, where  
 1018 we can ascertain whether a movie is still valid (i.e., still being presented in the theater) without any action.

1019 **Definition 8** (Regret minimization with everlasting best arm and explicit valid flag). Let  $\{\text{arm}_i\}_{i=1}^n$  represent  
 1020 a collection of  $n$  arms with an everlasting best arm,  $\text{arm}^*$ . Let  $W$  be the window size and  $T$  be the total  
 1021 number of trials. Denote  $\mu^*$  as the mean reward of the best arm  $\text{arm}^*$  (among all arms), and let  $t$  denote the  
 1022 variable for the index of the arriving arm. In this scenario, there exists an explicit `flag` function, and an arm  
 1023  $\text{arm}_i$  can be pulled at time  $t$  only if  $\text{flag}(\text{arm}_i, t) = \text{True}$ . Let  $\{i(\tau)\}_{\tau=1}^T$  be the set of indices of arms  
 1024 pulled by some algorithm, and the regret is defined as  $R_T := \sum_{\tau=1}^T (\mu^* - \mu_{i(\tau)})$ .

1025 If we have  $W$  memory, a straightforward algorithm is to *not* pull any arm until  $W$  steps and check whether  
 1026 the arm is still valid. The arm is valid if and only if it is the best arm, and we could therefore commit to the  
 1027 arm to achieve 0 regret.<sup>6</sup> As such, a natural question is whether we could do better with  $o(W)$  memory. In

1028  
 1029 <sup>6</sup>In this scenario, we assume that time continues to pass even when there are no more input arms available. Therefore,  
 1030 every arm, except for the everlasting best arm—including arm  $\text{arm}_n$ —may eventually expire as time goes on. Thus, we  
 1031 can simply wait long enough and use the `flag` function to identify the everlasting best arm, which will be the only valid  
 1032 arm remaining.

1033 An alternative assumption is that time ceases to progress when there are no new arms in the stream. In this case, the  
 final valid arms will consist of the everlasting best arm plus the last  $W$  arms, which are  $\{\text{arm}_{n-W+1}, \dots, \text{arm}_n\}$ . If the

what follows, we will show that the answer to the above question is *negative*: we will show that  $\Omega(W)$  space is necessary to achieve a total regret of  $o(T)$ , essentially indicating that the  $W$ -memory algorithm is *optimal*.

**Theorem 4.** *For any given parameters  $T$ ,  $n$ , and  $W$  such that  $T \geq n \geq 4W$ , there exists a family of streaming stochastic multi-armed bandit instances such that any single-pass streaming algorithm designed for a sliding-window stream of length  $n$  with a window size  $W$  and a memory of  $\frac{W}{8}$  arms must incur a total expected regret of at least*

$$\mathbb{E}[R_T] \geq \frac{T}{120}.$$

*Furthermore, there exists an algorithm that given a stream of  $n$  arms and parameters  $W$  and  $T$ , achieves 0 regret with a memory of  $W$  arms.*

Theorem 4 shows an extremely sharp “phase transition” for the memory-regret trade-off: with  $o(W)$  memory, we have to suffer  $\Omega(T)$  regret. On the other hand, if we slightly increase the memory to  $W$ , we could achieve 0 total regret.

To prove Theorem 4 we will utilize the following result on the sample-memory trade-offs for *storing an arm* in the memory from Assadi & Wang (2022).

**Proposition E.1** (Assadi & Wang (2022), cf. Chen et al. (2024)). *Consider the following distribution of  $m$  arms.*

**DIST**( $m, \sigma, \beta$ ): *A hard distribution with  $m$  arms for trapping the best arm*

1. *An index  $i^*$  sampled uniform at random from  $[m]$ .*
2. *For  $i \neq i^*$ , let the arms be with reward  $\mu_i = \sigma$ .*
3. *For  $i = i^*$ , let the arm be with reward  $\mu_{i^*} = \sigma + \beta$ .*

*Any algorithm that outputs (the indices of)  $\frac{m}{8}$  arms that contain the best arm on DIST with a probability of at least  $\frac{2}{3}$  has to use at least  $\frac{1}{1200} \cdot \frac{m}{\beta^2}$  arm pulls.*

The intuition behind our proof is that it is crucial not to overlook the best arm in a stream of options. By utilizing the distribution DIST, we can construct scenarios where it requires a considerable number of pulls to identify the best arm. Additionally, we can create instances that include multiple distributions of DIST, making it challenging to determine the best arm.

In these scenarios, an algorithm that uses a large number of arm pulls on earlier arms risks the possibility that the best arm may appear later in the stream. If the algorithm has already made too many pulls on suboptimal arms, it will incur substantial regret. Conversely, if the algorithm decides to conserve its pulls and primarily engages with the later part of the stream, there is a risk that the best arm could arrive early on, leading the algorithm to miss it entirely. As a result, any algorithm faces the inherent risk of missing the best arm, which can lead to significant regret.

**The proof of Theorem 4.** In the discussion by the start of Section E.1, we have already introduced the relatively simple algorithm that uses  $W$  arm memory and achieves 0 regret. We focus on proving the lower bound in the proof.

everlasting best arm is not included among the last  $W$  arms, we can identify it directly. If it is among the last  $W$  arms, the problem then shifts to a centralized regret minimization problem with those  $W$  arms. This represents a combination of our initial setting and the centralized regret minimization framework, so we will forego further discussion of this assumption.

1081 According to Yao's minimax principle Yao (1977), it is sufficient to establish the lower bound for deterministic  
1082 algorithms over a challenging distribution of inputs.

1083 We will first introduce the CONST distribution for clarity.  
1084

1085 **CONST( $m, \sigma$ ): A distribution with  $m$  arms with the same means**

- 1086 1.  $\forall i \in [m], \mu_i = \sigma$ .  
1087  
1088

1089 Let  $\beta = \min\{\sqrt{\frac{W}{1200T}}, \frac{1}{10}\}$ . Consider the following distribution of  $n$  arms.  
1090

1091 **SIGNAL( $n, W, \beta$ ): A hard distribution with  $n$  arms for regret minimization with an everlasting  
1092 best arm with expiation signal**

- 1093 1. The first  $W$  arms of SIGNAL( $n, W, \beta$ ) is DIST( $W, \frac{3}{5}, \beta$ ).  
1094  
1095 2. The  $W + 1$ -th to  $2W$ -th arms are CONST( $W, \frac{1}{5}$ ).  
1096  
1097 3. With probability of  $\frac{1}{2}$ ,  $2W + 1$ -th to  $3W$ -th arms are DIST( $W, \frac{2}{5}, \beta$ ), otherwise, DIST( $W, \frac{4}{5}, \beta$ ).  
1098  
1099 4. The remaining  $n - 3W$  arms are CONST( $n - 3W, \frac{1}{5}$ ).  
1100  
1101

1102 For any deterministic algorithm ALG, let  $T_{\text{ALG}}$  denote the number of pulls it uses until time  $2W$ . Since ALG  
1103 is a deterministic algorithm and the first  $2W$  arms are the same in both scenarios,  $T_{\text{ALG}}$  remains consistent  
1104 regardless of whether the arms from  $2W + 1$  to  $3W$  follow the distribution DIST( $W, \frac{2}{5}, \beta$ ) or DIST( $W, \frac{4}{5}, \beta$ ).  
1105

1106 Let  $\mathcal{E}_1$  be the event that the arms from  $2W + 1$  to  $3W$  are DIST( $W, \frac{2}{5}, \beta$ ) and  $\mathcal{E}_2$  be the event that they are  
1107 DIST( $W, \frac{4}{5}, \beta$ ). If  $T_{\text{ALG}} \leq \frac{T}{2}$ , then we have:

$$1108 \mathbb{E}[R_T] = \mathbb{E}[R_T | \mathcal{E}_1] \cdot \Pr[\mathcal{E}_1] + \mathbb{E}[R_T | \mathcal{E}_2] \cdot \Pr[\mathcal{E}_2] \geq \mathbb{E}[R_T | \mathcal{E}_1] \cdot \Pr[\mathcal{E}_1].$$

1109 Since  $\frac{1}{1200} \cdot \frac{W}{\beta^2} \geq T > \frac{1}{2}T \geq T_{\text{ALG}}$ , by Lemma E.1, the probability that the best arm is stored in memory at  
1110 time  $W + 1$  is at most  $\frac{2}{3}$ . Let  $\mathcal{F}$  be the event that the best arm is stored in memory at time  $W + 1$ . Then,

$$1111 \mathbb{E}[R_T | \mathcal{E}_1] = \mathbb{E}[R_T | \mathcal{E}_1 \cap \mathcal{F}] \cdot \Pr[\mathcal{F}] + \mathbb{E}[R_T | \mathcal{E}_1 \cap \neg\mathcal{F}] \cdot \Pr[\neg\mathcal{F}] \geq \mathbb{E}[R_T | \mathcal{E}_1 \cap \neg\mathcal{F}] \cdot \Pr[\neg\mathcal{F}].$$

1112 When the event  $\mathcal{E}_1 \cap \neg\mathcal{F}$  occurs, the best arm is not stored in memory at time  $2W + 1$ , and all the arms with  
1113 means  $\frac{3}{5}$  have expired. The remaining arms have means at most  $\frac{2}{5} + \beta \leq \frac{2}{5} + \frac{1}{10} = \frac{1}{2}$ . Since we can only  
1114 pull valid arms, the arms we can pull have a mean reward of at most  $\frac{1}{2}$ . Thus, the regret for each pull after  
1115 time  $2W$  is at least  
1116

$$1117 \frac{3}{5} + \beta - \frac{1}{2} \geq \frac{1}{10}.$$

1118 Therefore, we have:

$$1119 \mathbb{E}[R_T | \mathcal{E}_1 \cap \neg\mathcal{F}] \geq (T - T_{\text{ALG}}) \cdot \frac{1}{10} \geq \left(T - \frac{T}{2}\right) \cdot \frac{1}{10} = \frac{T}{20}.$$

1120 Thus,

$$1121 \mathbb{E}[R_T] \geq \mathbb{E}[R_T | \mathcal{E}_1] \cdot \Pr[\mathcal{E}_1] \geq \mathbb{E}[R_T | \mathcal{E}_1 \cap \neg\mathcal{F}] \cdot \Pr[\neg\mathcal{F}] \cdot \Pr[\mathcal{E}_1] \geq \frac{T}{20} \cdot \frac{1}{3} \cdot \frac{1}{2} = \frac{T}{120}.$$

On the other hand, if  $T_{\text{ALG}} \geq \frac{T}{2}$ , then we have:

$$\mathbb{E}[R_T] \geq \mathbb{E}[R_T | \mathcal{E}_2] \cdot \Pr[\mathcal{E}_2].$$

When event  $\mathcal{E}_2$  occurs, the best arm has a mean of  $\frac{4}{5} + \beta$ . The regret for each pull on the first  $2W$  arms would be at least

$$\frac{4}{5} + \beta - \frac{3}{5} - \beta = \frac{1}{5}.$$

Therefore,

$$\mathbb{E}[R_T] \geq \frac{1}{2} \cdot \mathbb{E}[R_T | \mathcal{E}_2] \geq \frac{1}{2} T_{\text{ALG}} \cdot \frac{1}{5} \geq \frac{T}{20}.$$

In conclusion, since  $\mathbb{E}[R_T] \geq \frac{T}{120}$  regardless of whether  $T_{\text{ALG}} \geq \frac{T}{2}$  or not, we have completed our proof. Theorem 4  $\square$

## E.2 REGRET MINIMIZATION WITH EVERLASTING BEST ARM AND IMPLICIT VALID FLAG

The second scenario is when we can still pull an expired arm, but doing so incurs a significant penalty. In this situation, any arm can be pulled at any time; however, if an expired arm is selected, a regret penalty of 1 is incurred.

Furthermore, we assume that the penalty associated with pulling an expired arm is not immediately known. If we were to be instantly informed about any penalties, the scenario could be simplified: we would incur a 1 regret penalty for all non-best arms in an effort to identify the best arm. This would lead to a total regret of  $n - 1$ , which is negligible given that  $T \gg n$ .

In this context, we can still assume the existence of a valid flag function, denoted as `flag`, to indicate whether an arm is valid. However, the algorithm cannot access this flag; therefore, it cannot determine whether an arm is valid.

**Definition 9** (Regret minimization with an everlasting best arm and implicit valid flag). Let  $\{\text{arm}_i\}_{i=1}^n$  represent a collection of  $n$  arms with an everlasting best arm,  $\text{arm}^*$ . Let  $W$  be the window size and  $T$  be the total number of trials. Denote  $\mu^*$  as the mean reward of the best arm  $\text{arm}^*$  (among all arms), and let  $t$  denote the variable for the index of the arriving arm. In this scenario, an implicit `flag` function exists. Any arm  $\text{arm}_i$  can be pulled at any time  $t$ , but if the flag indicates it is invalid (i.e., `flag`( $\text{arm}_i, t$ ) = `False`), a regret of 1 is incurred. Let  $\{i(\tau)\}_{\tau=1}^T$  be the set of indices of arms pulled by a given algorithm, and let  $\{\text{flag}_\tau = \text{flag}(\text{arm}_{i(\tau)}, t)\}_{\tau=1}^T$  represent the validity flag for the arms that were pulled. The total regret is defined as  $R_T := \sum_{\text{flag}_\tau = \text{True}} (\mu^* - \mu_{i(\tau)}) + \sum_{\text{flag}_\tau = \text{False}} 1$ .

In this setting, an  $\Omega(W)$  memory is still necessary to achieve a total regret of  $o(T)$ . Although there is an everlasting best arm, the lack of a signal about whether an arm has expired makes this setting strictly more challenging than the one in which we receive an expiry signal. Thus, the claims and proofs applicable to the setting with signals also remain valid in this case.

**Lemma E.2.** *There exists a family of streaming stochastic multi-armed bandit instances such that, for any given parameters  $T$ ,  $n$ , and  $W$ , where  $T \geq n \geq 4W$ , any single-pass streaming algorithm for a sliding-window stream of length  $n$  with a window size  $W$  and a memory of  $\frac{W}{8}$  arms must incur a total expected regret of at least*

$$\mathbb{E}[R_T] \geq \frac{T}{120}.$$

However, in this setting, the upper bound of total regret with trivial space complexity  $W - 1$  is no longer  $O_{n,W}(1)$ . Since we are not informed whether an arm is expired, it becomes challenging to identify the best

arm easily. When arms have means close to the best arm, we must pull these arms numerous times, which leads to significant regret, as each pull on an expired arm incurs a regret penalty of 1. Furthermore, even after many pulls on these arms, we may still incorrectly identify the best arm, resulting in additional regret. In fact, achieving  $o(T)$  total regret is impossible even with a memory capacity of  $n - 1$ , which is an even stronger condition than  $W - 1$  memory.

**Lemma E.3.** *There exists a family of streaming stochastic multi-armed bandit instances such that, for any given parameters  $T$ ,  $n$ , and  $W$  with  $T \geq n \geq 8W$ , any single-pass streaming algorithm for a sliding window stream of length  $n$ , with a window size  $W$  and a memory of  $n - 1$  arms, must incur*

$$\mathbb{E}[R_T] \geq \frac{T}{1800}$$

*total expected regret.*

The intuition behind this is that we cannot identify the best arm even after  $T$  pulls in  $\text{DIST}(W, \frac{3}{5}, \beta)$  with  $\beta = O(\frac{1}{T})$ , since  $O(\frac{W}{\epsilon^2})$  pulls are required to identify the  $\epsilon$ -best arm among  $W$  arms. In this scenario, when the arm is not expired, it will incur  $\beta$  regret per pull, while an expired arm incurs a regret of 1. Thus, a sound strategy would be to pull the arms before they expire. However, if there are two such distributions in the stream, we cannot determine in advance which distribution contains the best arm. Consequently, we risk either overspending pulls on the wrong distribution or incurring 1 regret per pull by not allocating most pulls to the correct distribution. This results in a total regret of  $\Theta(T)$  in either situation.

*Proof.* By Yao’s minimax principle Yao (1977), it is sufficient to demonstrate the lower bound for deterministic algorithms in the face of a challenging distribution of inputs. Let’s consider the following distribution:

**SIGNAL’( $n, W, \beta$ ): A hard distribution with  $n$  arms for regret minimization with an everlasting best arm with expiation signal**

1. The first  $W$  arms of  $\text{SIGNAL}(n, W, \beta)$  is  $\text{DIST}(W, \frac{3}{5}, \beta)$ .
2. The  $W + 1$ -th to  $2W$ -th arms are  $\text{CONST}(W, \frac{1}{5})$ .
3. With probability of  $\frac{1}{2}$ ,  $2W + 1$ -th to  $3W$ -th arms are  $\text{DIST}(W, \frac{2}{5}, \beta)$ , otherwise,  $\text{DIST}(W, \frac{4}{5}, \beta)$ .
4. The remaining  $n - 3W$  arms are  $\text{CONST}(n - 3W, \frac{1}{5})$ .

According to Lemma C.4, there exist constants  $c_1$  and  $c_2$  such that any algorithm using no more than  $c_1 \frac{W}{\beta^2} \log c_2$  pulls will not reliably return the  $\frac{\beta}{2}$ -best arm with a probability of at least  $\frac{3}{4}$ . We set  $\beta = \min\{\frac{1}{10}, \frac{c_1 W}{2T} \log c_2\}$ .

Now, consider  $\text{SIGNAL}'(n, W, \beta)$ . Let  $T_1$  denote the number of pulls made before time  $2W + 1$ ,  $T_2$  the number of pulls made between times  $2W + 1$  and  $4W$ , and  $T_3$  the number of pulls made after time  $4W$ . Let  $\mathcal{E}_i$  represent the event that  $T_i \geq \frac{T}{3}$ . Since  $T_1 + T_2 + T_3 = T$ , at least one of the events  $\mathcal{E}_i$  must occur. Thus, we have:

$$\mathbb{E}[R_T] = \mathbb{E}[R_T | \mathcal{E}_i] \cdot \Pr[\mathcal{E}_i] + \mathbb{E}[R_T | \neg\mathcal{E}_i] \cdot \Pr[\neg\mathcal{E}_i] \geq \mathbb{E}[R_T | \mathcal{E}_i] \cdot \Pr[\mathcal{E}_i].$$

Therefore, it suffices to show that  $\mathbb{E}[R_T | \mathcal{E}_i] \geq \frac{T}{600}$  for each  $i \in [3]$ .

**Case 1:  $\mathcal{E}_1$  occurs.** Let  $\mathcal{F}_1$  be the event that the arms from  $2W + 1$  to  $3W$  are drawn from  $\text{DIST}(W, \frac{2}{5}, \beta)$ , and let  $\mathcal{F}_2$  be the event that these arms are drawn from  $\text{DIST}(W, \frac{4}{5}, \beta)$ . Hence,

$$\mathbb{E}[R_T | \mathcal{E}_1] \geq \mathbb{E}[R_T | \mathcal{E}_1 \cap \mathcal{F}_2] \cdot \Pr[\mathcal{F}_2] = \mathbb{E}[R_T | \mathcal{E}_1 \cap \mathcal{F}_2] \cdot \frac{1}{2}.$$

When  $\mathcal{F}_2$  occurs, each pull on the first  $2W$  arms results in at least  $\frac{1}{10}$  regret. Since we spend at least  $\frac{T}{3}$  pulls on these first  $2W$  arms when  $\mathcal{E}_1$  occurs, we have:

$$\mathbb{E}[R_T | \mathcal{E}_1] \geq \mathbb{E}[R_T | \mathcal{E}_1 \cap \mathcal{F}_2] \cdot \frac{1}{2} \geq \frac{1}{10} \cdot \frac{T}{3} \cdot \frac{1}{2} = \frac{T}{60}.$$

**Case 2:  $\mathcal{E}_2$  occurs.** Similarly,

$$\mathbb{E}[R_T | \mathcal{E}_2] \geq \mathbb{E}[R_T | \mathcal{E}_2 \cap \mathcal{F}_1] \cdot \Pr[\mathcal{F}_1] = \mathbb{E}[R_T | \mathcal{E}_2 \cap \mathcal{F}_1] \cdot \frac{1}{2}.$$

When  $\mathcal{F}_1$  occurs, each pull on the arms from  $2W + 1$  to  $4W$  leads to at least  $\frac{1}{10}$  regret. Since we make at least  $\frac{T}{3}$  pulls in this range when  $\mathcal{E}_2$  occurs,

$$\mathbb{E}[R_T | \mathcal{E}_2] \geq \mathbb{E}[R_T | \mathcal{E}_2 \cap \mathcal{F}_1] \cdot \frac{1}{2} \geq \frac{1}{10} \cdot \frac{T}{3} \cdot \frac{1}{2} = \frac{T}{60}.$$

**Case 3:  $\mathcal{E}_3$  occurs.** Given that  $\beta = \frac{c_1 W}{2T} \log c_2$ , it is impossible to return the  $\frac{\beta}{2}$ -best arm (which is the exact best arm in this distribution) with a probability of at least  $\frac{3}{4}$  by using a maximum of  $T$  pulls. Let  $\mathcal{G}$  be the event that we pull at most  $\frac{T}{6}$  times on the best arm after time  $4W$ . If  $\Pr[\mathcal{G}] \leq \frac{1}{10}$ , we can devise a strategy that distinguishes the best arm from the others, which is impossible. Hence,  $\Pr[\mathcal{G}] \geq \frac{1}{10}$ .

After time  $4W$ , pulling a valid arm with a mean of  $\frac{1}{5}$  results in at least  $\frac{1}{10}$  regret, while pulling from an expired arm incurs a regret of 1. Thus, we incur at least  $\frac{1}{10}$  regret if we do not pull the best arm after time  $4W$ . When  $\mathcal{G}$  occurs, we will spend at least  $\frac{T}{6}$  pulls on arms other than the best arm beyond time  $4W$ , leading to:

$$\mathbb{E}[R_T | \mathcal{E}_3] \geq \mathbb{E}[R_T | \mathcal{E}_3 \cap \mathcal{G}] \cdot \Pr[\mathcal{G}] \geq \frac{1}{10} \cdot \frac{T}{6} \cdot \frac{1}{10} = \frac{T}{600}.$$

Since at least one of the events  $\mathcal{E}_i$  must occur, we have:

$$\max_{i \in [3]} \{\Pr[\mathcal{E}_i]\} \geq \frac{1}{3}.$$

Therefore,

$$\mathbb{E}[R_T] \geq \max_{i \in [3]} \{\mathbb{E}[R_T | \mathcal{E}_i] \cdot \Pr[\mathcal{E}_i]\} \geq \frac{T}{600} \cdot \max_{i \in [3]} \{\Pr[\mathcal{E}_i]\} \geq \frac{T}{600} \cdot \frac{1}{3} = \frac{T}{1800}.$$

□

## F FAILURE OF STATE-OF-THE-ART ALGORITHMS IN VANILLA STREAMING MABS

In this section, we will provide simple counterexamples and proofs to illustrate why the state-of-the-art algorithms used in vanilla streaming multi-armed bandits (MABs) do not perform well in sliding-window MABs.

It is important to note that, based on Theorems 1 and 3 that we have established, we have demonstrated that any single-pass streaming algorithm utilizing  $o(W)$  memory will fail to address both the weak and strong exploration problems or achieve a regret of  $o(T)$ . Consequently, the state-of-the-art algorithms from vanilla streaming MABs will also fail in the sliding-window setting, as supported by our theorems. While we have already established this in a general context, we believe that providing a simpler, specific proof related to these algorithms will help readers better understand why algorithms with  $o(W)$  memory fail in sliding-window scenarios.

The state-of-the-art algorithm for streaming exploration was proposed by Assadi & Wang (2020). This algorithm can identify the best arm with a probability of at least  $1 - \delta$  using only 1 unit of memory and  $O\left(\frac{n}{\varepsilon^2} \log\left(\frac{1}{\delta}\right) + \log^2(n) \cdot \frac{\log^2\left(\frac{1}{\delta}\right)}{\varepsilon^3}\right)$  pulls. However, we will present a counterexample demonstrating that the algorithm by Assadi & Wang (2020) cannot effectively address weak exploration in the sliding-window setting, even with a success probability of at least 0.6.

**Lemma F.1.** *There exists a data stream such that the algorithm by Assadi & Wang (2020) cannot resolve the weak exploration for this stream with a probability of at least 0.6.*

*Proof.* Consider the data stream defined by  $\mu_i = 1 - \frac{i-1}{n}$ , which has a decreasing mean. In this scenario, the best arm from time  $t = 1$  to  $W$  is  $\text{arm}_1$ , while the best arm at time  $t = i$  for  $i > W$  is  $\text{arm}_{i-W+1}$ .

If the algorithm can correctly identify the best arm from time  $t = 1$  to  $W$  with a probability of at least 0.6, since it has only 1 unit of memory, the arm stored at that time must be  $\text{arm}_1$ . Consequently, at time  $t = W$ , only  $\text{arm}_1$  will be stored in memory, causing us to lose access to  $\text{arm}_2$  indefinitely, which is the best arm at time  $t = W + 1$ . Thus, it becomes impossible for the algorithm to return the correct best arm at time  $t = W + 1$  with a probability greater than  $1 - 0.6 = 0.4$ . This indicates that the algorithm fails to resolve weak exploration with a probability of at least 0.6.

Conversely, if the algorithm fails to return the correct best arm from time  $t = 1$  to  $W$  with a probability of at least 0.6, it also indicates a failure in solving weak exploration with a probability of at least 0.6.

Therefore, it is impossible for the algorithm to successfully resolve weak exploration with a probability of at least 0.6.  $\square$

The state-of-the-art algorithm for regret minimization was proposed by Wang (2023). This algorithm achieves a total regret of  $O(n^{1/3}T^{2/3})$ , which matches the lower bound of regret for streaming multi-armed bandits (MABs), using  $\lceil \log^* n \rceil + 1$  units of memory. The key idea behind their algorithm is to first identify an  $\varepsilon$ -best arm for the entire stream and then allocate the remaining pulls to that  $\varepsilon$ -best arm. By choosing  $\varepsilon = O\left(\sqrt[3]{\frac{n \log n}{T}}\right)$ , this approach minimizes the total regret to  $O(n^{1/3}T^{2/3})$ .

However, their algorithm cannot be applied to the sliding-window setting. The strategy of locating an  $\varepsilon$ -best arm and dedicating all remaining pulls to it is flawed, as the  $\varepsilon$ -best arm can expire over time, making it unavailable for pulling when it does. Therefore, the algorithm proposed by Wang (2023) is not even well-defined in the sliding-window context.

A natural attempt to adapt the algorithm for the sliding-window setting would be to identify an  $\varepsilon$ -best arm for each epoch and allocate all remaining pulls for that epoch to the identified arm. However, we will demonstrate that there exist data streams that require the algorithm to utilize at least  $O\left(\frac{1}{\varepsilon}\right)$  memory to return the  $\varepsilon$ -best arm for each epoch.

**Lemma F.2.** *There exist data streams and  $\varepsilon \in (0, 1)$  such that it is impossible to return the  $\varepsilon$ -best arm at any time  $t$  with a probability of at least 0.6 using only  $o\left(\frac{1}{\varepsilon}\right)$  memory.*

*Proof.* Let  $\varepsilon = \frac{1}{100 \cdot W}$ . Define the means of the arms as follows:

$$\mu_i = 1 - 2\varepsilon \cdot \left( i - 1 - 50 \cdot W \cdot \left\lfloor \frac{i}{50 \cdot W} \right\rfloor \right).$$

This means the data stream consists of arms with decreasing means, where each subsequent arm has a mean  $2\varepsilon$  smaller than the previous arm. The mean of an arm is reset to 1 when it reaches 0.

For this type of data stream, since each subsequent arm has a mean  $2\varepsilon$  lower than its predecessor, the  $\varepsilon$ -best arm at any time  $t$  is actually the best arm at that time. Consequently, the algorithm must store the best arm to accurately return the  $\varepsilon$ -best arm. Given the decreasing nature of the arm means, it is necessary to keep track of all arms in the window, requiring a memory size of  $W = \Omega\left(\frac{1}{\varepsilon}\right)$ .  $\square$

Thus, since certain data streams exist where  $W = o\left(\sqrt[3]{\frac{n \log n}{T}}\right)$ , it follows that the adapted algorithm cannot operate with  $o(W)$  memory for such streams.

## G ADDITIONAL SETTINGS AND RESULTS OF THE EXPERIMENTS

We provide additional details and results of the experiments with simulations in different settings (including the regret minimization problem with the everlasting arm regret notion).

### G.1 EXPERIMENTAL RESULTS ON PURE EXPLORATION

We implement Algorithm 1 for the  $\varepsilon$  exploration over the streams. Here, if we have  $m$  memory, then our input to Algorithm 1 is  $\varepsilon = O(1/m)$ . We report the *mean*, *median*, and *maximum gaps* over the  $n - W + 1$  steps for different sizes of memories. The illustration of the results could be shown as in Figures 2 to 4. For the trade-offs between the memory and the number of arm pulls, we only report the  $W = 50$  case since it contains the cases for  $W \in \{10, 20\}$  up to a very small constant factor.

From the figures, it could be observed that there are generally trade-offs between memory/quality and memory/samples. The trade-off curve for the memory/quality is mostly stable: for the mean and median statistics, the error bar obtained from 10 runs is quite narrow. The sample complexity scales quadratically with the memory, which is consistent with the  $1/\varepsilon^2$  term in the sampling rate. Finally, note that the sample complexity does *not* change significantly w.r.t. the number of arms, which is also consistent with the fact that the asymptotic number of arm pulls on each arm is  $O(\log W/\varepsilon^2)$ , which is independent of  $n$ .

1363  
 1364  
 1365  
 1366  
 1367  
 1368  
 1369  
 1370  
 1371  
 1372  
 1373  
 1374  
 1375  
 1376  
 1377  
 1378  
 1379  
 1380  
 1381  
 1382  
 1383  
 1384  
 1385  
 1386  
 1387  
 1388  
 1389  
 1390  
 1391  
 1392  
 1393  
 1394  
 1395  
 1396  
 1397  
 1398  
 1399  
 1400  
 1401  
 1402  
 1403  
 1404  
 1405  
 1406  
 1407  
 1408  
 1409

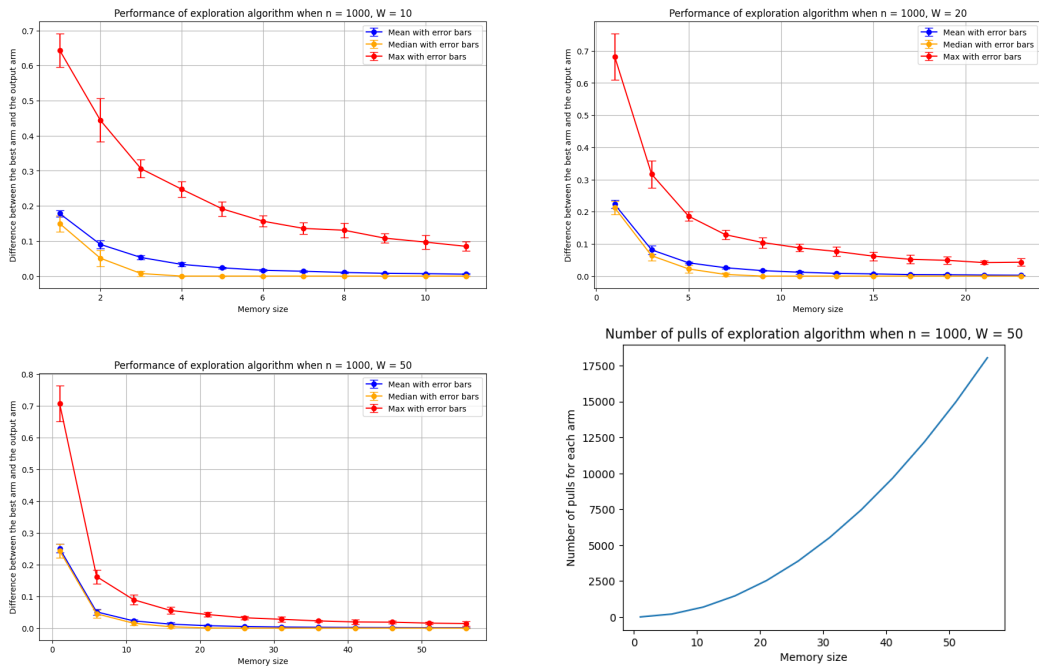

Figure 2: An illustration of the memory-quality trade-off in  $\epsilon$  exploration for  $n = 1000$ .

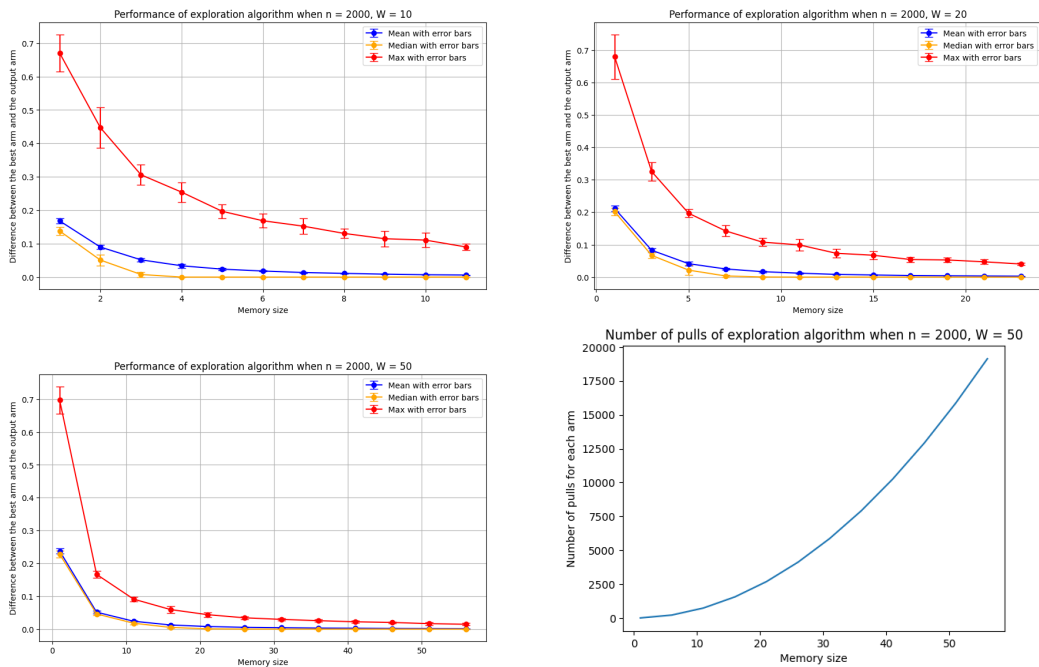

Figure 3: An illustration of the memory-quality trade-off in  $\epsilon$  exploration for  $n = 2000$ .

1410  
 1411  
 1412  
 1413  
 1414  
 1415  
 1416  
 1417  
 1418  
 1419  
 1420  
 1421  
 1422  
 1423  
 1424  
 1425  
 1426  
 1427  
 1428  
 1429  
 1430  
 1431  
 1432  
 1433  
 1434  
 1435  
 1436  
 1437  
 1438  
 1439  
 1440  
 1441  
 1442  
 1443  
 1444  
 1445  
 1446  
 1447  
 1448  
 1449  
 1450  
 1451  
 1452  
 1453  
 1454  
 1455  
 1456

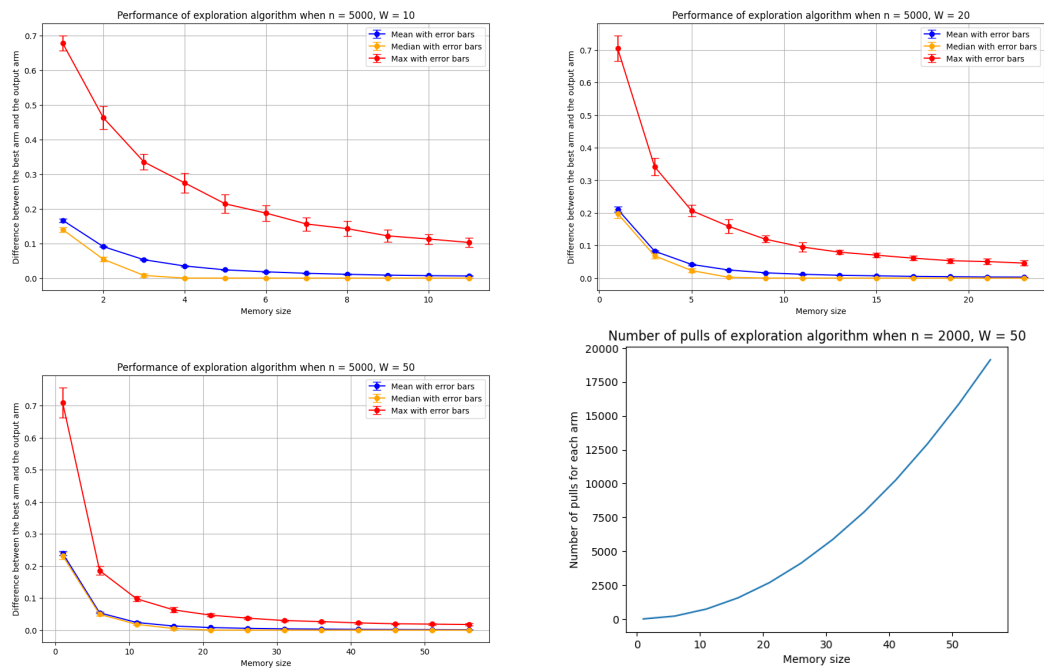

Figure 4: An illustration of the memory-quality trade-off in  $\epsilon$  exploration for  $n = 5000$ .

## G.2 EXPERIMENTAL RESULTS ON REGRET MINIMIZATION

We implement our  $W$ -memory algorithms for both the *everlasting regret* (the algorithm in Theorem 4) and *epoch-wise regret* (the algorithm in Theorem 3) cases. The purpose of the experiments is to show that the regret drops sharply once we have  $W$  arm memory. To this end, we need to define how to proceed with the  $W$ -memory algorithms when we only have  $o(W)$  arm memory. A natural approach is to simulate the reservoir sampling: after the memory is full, for each arriving arm, we toss a fair coin with bias  $m/t$  for the  $t$ -th arriving arm to decide whether we admit the new arm to the memory (by uniformly at random discarding an arm existing in the memory).

**Experiments for regret with the everlasting best arm.** The experimental results for regret minimization with the everlasting best arm are shown as Figures 5 to 7. Here, we commit to any arm in the end if we do not have the best arm in the memory. With 10 independent runs of the algorithm, we report both the mean regret and the range of the regrets.

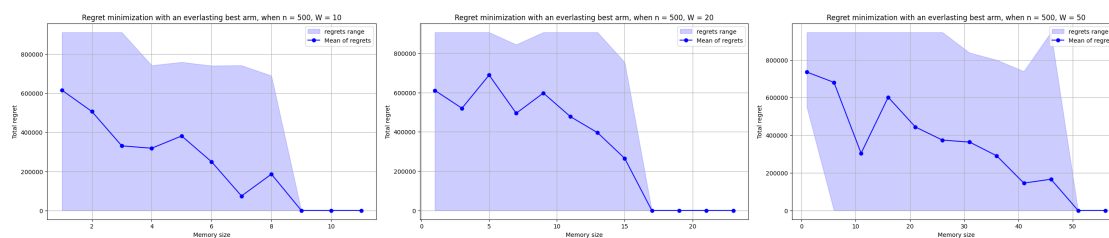

Figure 5: An illustration of the memory-regret trade-off for the everlasting best arm setting with  $n = 500$ .

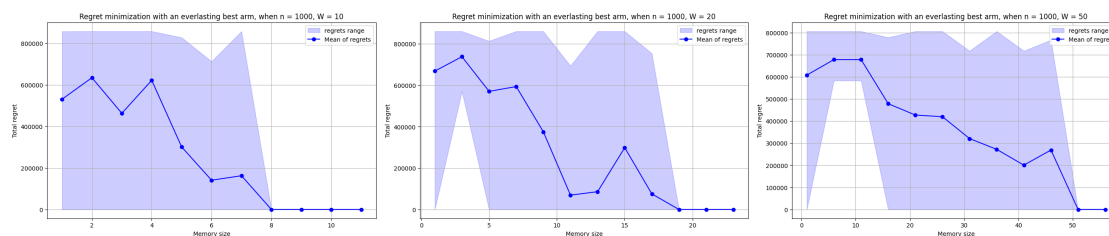

Figure 6: An illustration of the memory-regret trade-off for the everlasting best arm setting with  $n = 1000$ .

As we could observe in the figures, among the 10 executions of the algorithm, although the algorithm might get “lucky” with  $o(W)$  memory, the range of the regret before reaching the  $W$  memory is always wide, and the regret could always be high. On the other hand, after we have  $W$  memory, we could easily identify the best arm and achieve 0 memory. The ranges observe a sharp drop at the  $W$ -memory point, which validates our theoretical results.

1504  
 1505  
 1506  
 1507  
 1508  
 1509  
 1510  
 1511  
 1512  
 1513  
 1514  
 1515  
 1516  
 1517  
 1518  
 1519  
 1520  
 1521  
 1522  
 1523  
 1524  
 1525  
 1526  
 1527  
 1528  
 1529  
 1530  
 1531  
 1532  
 1533  
 1534  
 1535  
 1536  
 1537  
 1538  
 1539  
 1540  
 1541  
 1542  
 1543  
 1544  
 1545  
 1546  
 1547  
 1548  
 1549  
 1550

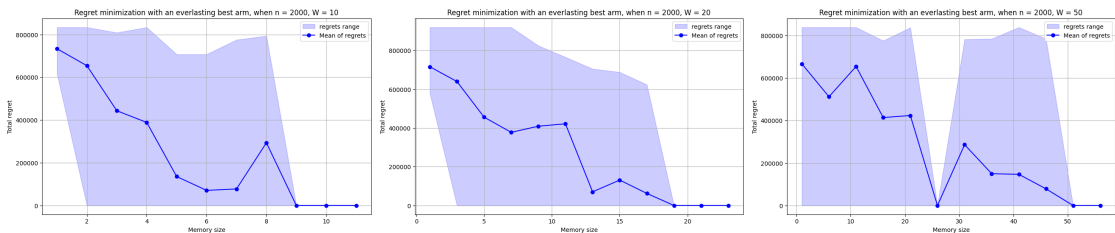

Figure 7: An illustration of the memory-regret trade-off for the everlasting best arm setting with  $n = 2000$ .

**Experiments for regret with the epoch-wise regret.** The experimental results for regret minimization in the epoch-wise regret setting are shown as Figures 8 to 10. If  $m < W$ , we will run UCB-based algorithms on the arms in the memory. Again, with 10 independent runs of the algorithm, we report both the mean and the range of the regrets.

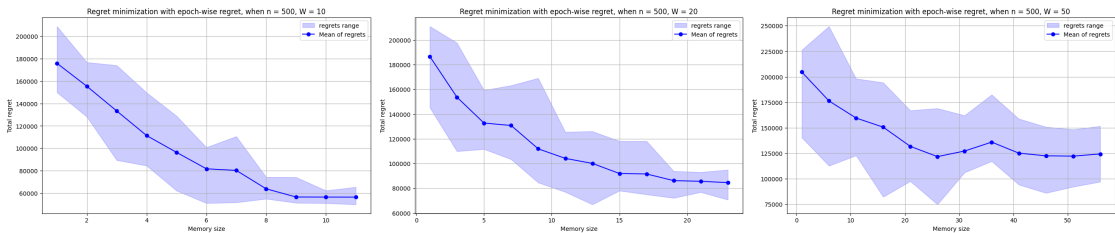

Figure 8: An illustration of the memory-regret trade-off for the epoch-wise regret setting with  $n = 500$ .

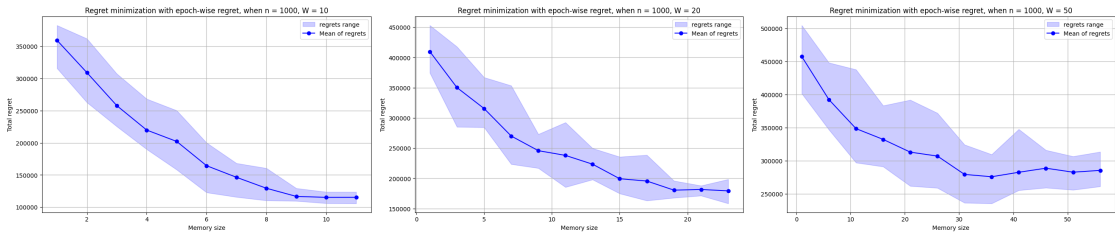

Figure 9: An illustration of the memory-regret trade-off for the epoch-wise regret setting with  $n = 1000$ .

From the figures, it could be observed that although the memory-regret trade-offs are smoother than in the case of the everlasting-regret setting, the trend still follows our result in Theorem 3. Furthermore, after reaching the memory of  $W$  arms, the regret basically does not change with more memory, and the variances become much smaller.

1551  
1552  
1553  
1554  
1555  
1556  
1557  
1558  
1559  
1560  
1561  
1562  
1563  
1564  
1565  
1566  
1567  
1568  
1569  
1570  
1571  
1572  
1573  
1574  
1575  
1576  
1577  
1578  
1579  
1580  
1581  
1582  
1583  
1584  
1585  
1586  
1587  
1588  
1589  
1590  
1591  
1592  
1593  
1594  
1595  
1596  
1597

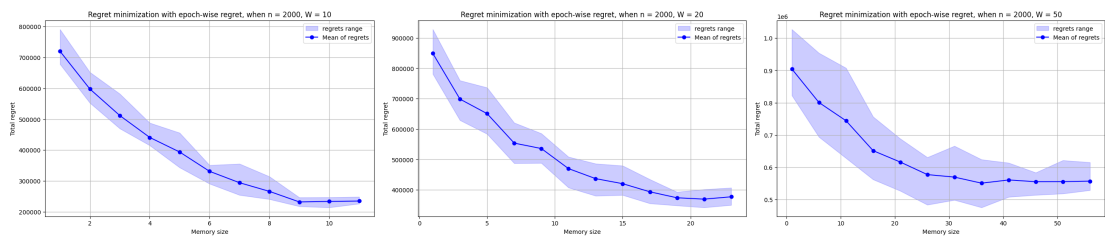

Figure 10: An illustration of the memory-regret trade-off for the epoch-wise regret setting with  $n = 2000$ .
